# Supplementary material for: Did alcohol facilitate the evolution of complex societies?
Source: Research Square preprint supplement (doi:10.21203/rs.3.rs-3685937/v1), 2024-01-17
Supplement: Supplementary file 1 [file ALCOHOL_dataset.xlsx]

## Sheet: Sheet1
SCCS_ID	Society_name	eHRAF_ID	Focal_Time	Alcohol_all	Alcohol_WB	Wines	Beers	Distilled	Summary	References
SCCS1	Nama	Khoi (FX13)	1860	8	8	8	3	4	Nama always produced and drank honey mead. In FT, European alcoholic liquors were present and excessive drinking was not unusual (especially among the detribalized people). Presence of brewed alcohol is not mentioned.	Schultze 1958[1907]: 25-26,45,125; Schapera 1930: 241,405
SCCS2	!Kung	San (FX10)	1950	0	0	0	0	0	!Kung (San) did not produce or consume any alcohol. "They have no alcoholic drinks and use no infusions of herbs" (Marshall 1965: 251).	Marshall 1965: 251; Marshall 1976: 79
SCCS3	Tsonga	Tsonga (FT06)	1895	8	8	8	8	6	Tsonga produced several types of alcoholic drinks, including beers (from cereals), fruit wines, and palm wines. "Tsonga saw that White people used sugar-cane to distil rum and they attempted to do the same [..] the result of their attempt is called Shiwayawaya" (but it's not certain that it was an actual distillation). The beer-drinking parties are as old as the tribe itself, or at any rate, as a…	Junod 1927a: 341-342; Junod 1927b: 39-46,609-613
SCCS4	Lozi	Lozi (FQ09)	1900	8	8	2	8	2	Lozi produced beer (probably from millet, sorghum or maize). No mention of other types of alcoholic beverages.	Gluckman 1941: 35,69,118; Gluckman 1959: 71
SCCS5	Mbundu	Ovimbundu (FP13)	1890	8	8	NA	8	5	Mbundu traditionally produced beer (from "corn" or sorghum?). Later probably also stronger beer made from emmer wheat. Around 1900, the Ovimbundu have themselves learned to distil rum (okacipembe) from sweet potatoes, sugar-cane, pumpkins, etc. Childs mentions mead, but Hambly says that "no drink was made from honey only", but honey was added into two types of alcoholic drink (ochasa and ovingund…	Childs 1949: 32-33,206; Hambly 1934: 141,149-150,179,221
SCCS6	Suku	Suku (FO46)	1920	8	8	8	2	2	Palm trees supply the Suku with ‘wine’, highly prized for itself and important in a variety of social and ritual contexts. There is no mention of any other alcohol.	Kopytoff 1964: 92-93; Kopytoff 1965: 441,445; Kopytoff 1990: 78
SCCS7	Bemba	Bemba (FQ05)	1897	8	8	2	8	2	Bemba beer (ubwalua) is one of their most important foodstuffs. It is made from the staple cereal itself (millet). No mention of other types of alcoholic beverages.	Richards 1939: 76-81,97-99,145-147
SCCS8	Nyakyusa	Nyakyusa and Ngonde (FN17)	1934	8	8	3	8	2	Nyakyusa produced the millet beer which was the ordinary material of hospitality. The use of wine mentioned only among the Nyakyusa Christians. No mention of distilled beverages.	Wilson 1936: 254,260; Wilson 1939: 42-43; Wilson 1957: 62,228-229; Wilson 1959: 196
SCCS9	Hadza	Hadza (FN11)	1910	2	2	2	2	2	Hadza never made alcohol themselves. They get alcoholic beverages (e.g. mead) via trade, but probably only after FT.	Bleek 1931: 278; Marlowe 2004: 691; Marlowe 2010: 36,253,Tab. 2.2
SCCS10	Luguru	Luguru (FN32)	1925	8	8	2	8	2	Luguru produced beer made of sorghum or maize. No mention of other types of alcoholic beverages.	Scheerder & Tastevin 1950: 256,262,268-269; Beidelman 1967: 27
SCCS11	Kikuyu	Gikuyu (FL10)	1920	8	8	8	7	2	Kikuyu produced sugar-cane "beer" and mead ("honey-beer"). Probably also millet beer, but this is mentioned only by Lambert (1956). No mention of distilled beverages.	Kenyatta 1953: 55,79,192,246,326-7; Lambert 1956: 82,88,90,98; Leakey 1952: 80; Routledge & Routledge 1910: 62-65
SCCS12	Ganda	Ganda (FK07)	1875	8	8	7	7	2	The national drink was "beer" made from ripe plantains. The fruit of the so-called male plaintain was used for brewing, and was never cooked or eaten. Some millet was baked, ground into coarse flour, and added to the juice. Unfermented "plantain wine" also mentioned. Unsure whether these drinks are technically beers or wines. No mention of distilled beverages.	Roscoe 1911: 8,24,101,429-432,440-442; Mair 1934: 105,113-114
SCCS13	Mbuti	Mbuti (FO04)	1950	NA	NA	NA	4	2	Mbuti made no alcoholic drinks from honey, but they ate/drank fermented and “intoxicating” honey "apuma" (but not clear whether alcoholic!). Other alcoholic beverages (e.g. palm-wine, beer) were obtained through trade. No mention of distilled beverages.	Turnbull 1962: 32,54,157,215,271; Turnbull 1965a: 175; Turnbull 1965b: 29,34,45,169,Tab.3b; Ichikawa 1981: 56,60-61
SCCS14	Nkundo	Mongo (FO32)	1930	8	8	7	NA	2	Nkundo (Mongo) made alcoholic beverages. Sugar-cane and palm "beers" are mentioned, but technically they were probably wines. No mention of distilled beverages.	Hulstaert 1959[1938]: 30,186,323,454; Boelaert 1959[1940]: 5; Nelson 1994: 20,69,139
SCCS15	Banen	Banen (FH26)	1935	8	8	8	8	4	Banen produced maize beer and palm wine. "Imported spirits" also mentioned.	Dugast 1954: 140,150; Dugast 1955: 473-477,560-561,602
SCCS16	Tiv	Tiv (FF57)	1920	8	8	4	8	2	Tiv produced beer from maize, millet or sorghum (guinea corn). "Tiv do not tap palm wine from the trees, though they drink it gladly when it can be bought from peoples farther south". No mention of distilled beverages.	Abraham 1933: 28,131-132,215,219-220; Akiga 1939: 70-74,196-199;267-272; Bohannan & Bohannan 1958: 272-279; Bohannan & Bohannan 1968: 52-53,72-75,112,126,132-133,135,150,186,200
SCCS17	Igbo	Igbo (FF26)	1935	8	8	8	3	4	Green (1964; S1) and Uchendu (1965; S2) do not mention beer and Basden (1966; E2) says that they did not brew any intoxicating liquor. However, all sources mention production of palm wine. Foreign beverages also mentioned (e.g. gin, whisky).	Green 1964: 35,45,170,183; Uchendu 1965: 25,40,73; Meek 1970: 29,67,199; Basden 1966: 117,125,196-7,273,404-7
SCCS18	Fon	Fon (FA18)	1890	8	8	8	8	4	Although evidence in S1 sources is scarce, Fon made palm wine, native sorghum (millet?) beer and probably also maize beer (Manning 1980: 62-63). They were also buying foreign alcohol (e.g. rum).	Herskovits 1933: 38,41; Herskovits 1967: 59,108,128; Le Herissé 1911: 89,176,308-309; Manning 1980: 62-3
SCCS19	Ashanti	Twi (FE12)	1895	8	8	8	7	4	Ashanti produced palm-wine and consumed imported distilled beverages (e.g. rum, whisky). They probably also consumed local beer, but only in small quantities. Fermented beverages made from honey or fruits also mentioned. Locally-distilled gin was produced probably after the FT.	Rattray 1923: 59,94,116,135,137,154; Rattray 1927: 42,45,81-5,150,314; Rattray 1929: 14,113-4,133,302-3,323; Warren 1975: 19; McLeod 1981: 14-5,78,125; Dumett 1974: 82,84-5,93-4
SCCS20	Mende	Mende (FC07)	1945	8	8	8	4	4	Mende traditionally tapped palm-wine. In FT, they also consumed European beverages (e.g. gin, whisky, rum, bottled beer).	Little 1951: 41,52,182,257,268,270; Staub 1958[1936]: 22-3,48
SCCS21	Wolof	Wolof (MS30)	1950	7	7	7	7	4	Those who were not strict Muslims formerly made use of several types of local drink: mead, millet beer, and palm wine. Imported trade brandy was generally preferred to all these. In FT, mead and millet beer were no longer made, but palm-wine was probably still produced.	Gamble 1957:38,45,57-58,70,102; Ndao 2008: 20-3,28,Tab.1
SCCS22	Bambara	Bambara (FA08)	1902	8	8	7	8	2	Bambara made native millet beer. A few mentions about mead/hydromel. No mention about wine and distilled beverages.	Henry 1960[1910]: 45,115,117,191-2,233,246; Monteil 1960[1924]: 32,199,217,259,263,324; Paques 1959[1954]:35
SCCS23	Tallensi	Tallensi (FE11)	1934	8	8	2	8	2	Tallensi made beer (from guinea-corn or millet). "In the average compound beer is never cooked except for ritual purposes which may be twice or thrice a year. Chiefs and headmen, who always have a surplus of grain often, and elders occasionally keep a supply of beer on hand for guests". Wine and distilled beverages not mentioned.	Fortes & Fortes 1936: 257-9; Fortes 1945: 151-2; Fortes 1949: 180
SCCS24	Songhai	Songhai (MS20)	1940	1	1	1	1	1	There is no mention of alcoholic beverages in Rouch (1954, 1960; S1), the absence is probably due to Islamic religion (see Rouch 1954: 33n1). "Prohibitions against drinking intoxicants and gambling are generally observed, although no secular punishment marks divergence from the pattern." (Miner 1953: 77)	Rouch 1954: 33; Rouch 1960; Miner 1953: 77
SCCS25	Wodaabe Fulani	Fulani (MS11)	1951	1	1	1	1	1	Fulani "use very few excitants - kola and tobacco […] as well as certain herbal potions". No mention of alcoholic beverages in Dupire (1962, 1963; S1), probably because they are Muslims.	Dupire 1962; Dupire 1963; Stenning 1959
SCCS26	Zazzagawa Hausa	Hausa (MS12)	1900	1	1	1	1	1	Smith (1955, 1965; S1) describes Muslim Hausa of Zaria. Alcoholic beverages are not mentioned, although other stimulants (tobacco, kola) are => absence probably due to prohibition. Beer (Giya) made by Maguzawa (pagan Hausa) is “subject to the Muslim taboo on alcohol” (Hill 1972: 253).	Smith 1955; Smith 1965; Hill 1972: 253,277
SCCS27	Masa	Masa (FI21)	1910	8	8	NA	8	NA	The Masa made "Durrahbier" (from sorghum). Perhaps also mead and distilled sorghum spirit, but this information is uncertain.	von Hagen 1912: 86-88; de Garine 1964: 92-93,111,120
SCCS28	Azande	Azande (FO07)	1905	8	8	6	8	6	Azande made several types of beers from cereals and cassava. Banana beer, fermented honey-water, and palm-wine are also mentioned, but it is uncertain to what extent they are indigenous. The distillation of spirits from grain had been introduced by the Arabs from the north (date unknown).	Baxter & Butt 1953: 18,45-46; Evans-Pritchard 1971: 73,86; Czekanowski 1924: 28-29
SCCS29	Fur	Fur (MQ08)	1880	8	8	8	8	0	Fur made beer from dhurra (sorghum), and wine from kuma (small fruits). No spirits were manufactured. "In times of famine the seeds of the Cenchrus catharticus or Dactyloctenium aegyptiacum may be used instead of grain in beermaking".	Felkin 1886: 212,215-217,227-228; Beaton 1948: 10,32
SCCS30	Otoro	Nuba (FJ21)	1930	8	8	2	8	2	Otoro Nuba made beer from grain, but it is not specified from which type. In Otoro community, beer-drinking is an institution, every ritual or feast is celebrated with beer-drinking. No mention about wine and distilled beverages.	Nadel 1947: 54,78,127,135-136,151,519
SCCS31	Shilluk	Shilluk (FJ23)	1910	8	8	2	8	2	Shilluk made beer from dura (sorghum) and/or millet. Wine and spirits are not mentioned, but in general there is very little mention of alcoholic beverages.	Seligman & Seligman 1932: 64-65, 80-81, 104; Westermann 1912: XXXIV, XXXVII
SCCS32	Mao	Mao (MP19)	1939	8	8	8	8	0	All Mao drank large quantities of fermented beverages (from barley, maize, millet? and sorghum?) and mead. Besides these drinks, they knew only milk and water.	Grottanelli 1940: 240-3,253; Cerulli 1956: 19
SCCS33	Kafa	Kaffa (MP14)	1905	8	8	8	8	4	Kaffa made mead ("honigwein") and beer (from barley and sorghum, maybe also millet). They had also access to imported "Honigschnaps" ("Araki der Amhara").	Bieber 1920: 253-4,257-8,374-5; Huntingford 1955: 109,130
SCCS34	Maasi	Masai (FL12)	1900	8	8	8	4	2	Maasi made mead ("honey-wine" or "honey beer"), and they purchased from other societies two kinds of beer (made out of bananas and Eleusine, maize, or sorghum). Distilled beverages are not mentioned.	Hollis 1905:318; Merker 1971[1910]:46,75
SCCS35	Konso	Konso (MP17)	1935	8	8	2	8	2	Konso made beer (chaqa or chaga) from sorghum and other cereals. Honey was not used to make a drink. No mention about wine and distilled beverages.	Hallpike 1970: 37-38; Hallpike 2008: 34,37,59,113-4,219,367-368
SCCS36	Somali	Somali (MO04)	1900	1	1	1	1	1	Somali are Muslims, the vast majority of them observe a ban on alcoholic beverages (= information from E1 source - Puccioni 1960[1936]). Lewis (1961; S1 and 1955; S2) does not mention alcoholic beverages at all.	Lewis 1955; Lewis 1961; Puccioni 1936: 119
SCCS37	Amhara	Amhara (MP05)	1953	8	8	8	8	6	Amhara made mead (from honey) and beer (from barley, wheat, sorghum, millet, oats, etc.). The only distilled drink among traditional beverages (araqi) was very likely of Arab introduction.	Messing 1985: 39,43-4,54,58,61-2,170,266-7
SCCS38	Blin (Bogo)	Bilen (MN06)	1855	7	7	7	7	NA	The consumption of mead and unspecified beer are mentioned a few times by Munzinger (2019[1859]), but without any information on their production. No mention of distilled beverages.	Munzinger 2019[1859]: 41,44-6,63
SCCS39	Barabra (Kenuzi Nubians)	Nubians (MR08)	1900	NA	NA	NA	NA	NA	No information in S1 source (Herzog 1957) about alcoholic beverages or other intoxicants.	Herzog 1957
SCCS40	Teda	Teda (MS22)	1950	8	8	8	NA	2	Although Teda were Muslims, they produced and drank palm wine. Fermented drink from millet is also mentioned, but not clear whether it was alcoholic. Cline (1950; E1) mentions beer made from imported "grain". Distiled beverages are not mentioned.	Chapelle 1982[1957]: 77,178,180,308; Kronenberg 1981[1958]: 12; Le Coeur 1981[1950]: 35,58; Cline 1950: 30
SCCS41	Tuareg Ahaggar	Tuareg (MS25)	1900	1	1	1	1	1	As Muslims, Tuareg must abstain from drinking fermented drinks which are harīm. They drink only water and milk. As stimulants or narcotics, they know only tobacco.	Benhazera 1960[1908]; Lhote 1956[1944]: 95-6
SCCS42	Riffians	Berbers of Morocco (MX03)	1926	1	1	1	1	1	Riffians are Muslims. Wine-making is not present except by a few Riffians who have learned the process in Algeria. However, it is possible that the Riffians formerly made wine and then gave up the practice. "In adopting Islam it seems the Riffians only slowly renounced alcohol. Leo Africanus, writing in the sixteenth century, said they had a penchant for drunkenness, whereas a twentieth-century S…	Coon 1931: 62; McNeill 2003: 47
SCCS43	Egyptians	Fellahin (MR13)	1950	7	7	NA	7	6	No mention of alcohol in Ammar (1954; S1). "Wine he does not drink, as it is forbidden by his religion" (Ayrout 1945:89-90). Despite religious restrictions, alcohol (especially beer, but also wine and liquors) has always been produced and consumed in Egypt (Rios 2016).	Ammar 1954; Ayrout 1945: 89-90; Rios 2016
SCCS44	Hebrews	Israelites (MF07)	-621	8	8	8	7	2	Hebrews produced and consumed wine (from grape vine, pomegranates, dates, etc.) and maybe also mead and beer (from barley).	Faust & Weis 2005: 80-82; Heaton 1956: 86-87,93,103-106; Borowski 2003: 28-9,70-71
SCCS45	Babylonians	Babylonians (MH07)	-1750	8	8	8	8	2	Babylonians produced barley beer and date-wine. Wine from the grape was known, but probably as an import.	Leick 2003: 90-91,143-144; Saggs 1988: 164-165
SCCS46	Rwala	Rwala (MD04)	1913	1	1	1	1	1	There is no mention of alcoholic beverages, although Musil (1928, S1) has a whole chapter on Food, including coffee (and he has a section on smoking pipes). There is also no mention of alcohol in Raswan (1947). The Rwala are Muslims, therefore absence probably due to religious prohibition. In 1981, narcotics (other than hashish) were despised (Lancaster 1981: 93).	Musil 1928; Raswan 1947; Lancaster 1981: 93
SCCS47	Turks	Turks (MB01)	1950	7	7	7	7	6	Alcohol (beer, wine, raki etc.) was produced in Turkey in FT, however, it was religiously forbidden, so many Turkish Muslims didn't drink... Some drink a little alcohol, but this activity is frowned upon (Pierce 1964: 18; S1). Makal (1954:141-142; S1) says that there may be some bottles of raki and some wine in village shop. Stirling (1965; S1) doesn't mention alcohol at all.	Makal 1954: 141-142; Pierce 1964: 18; Stirling 1965; Evered & Evered 2016: 42-4; Michalak & Trocki 2006: 548
SCCS48	Gheg	Albanians (EG01)	1910	8	NA	NA	NA	8	Muslim Gheg made and drank rakia, but were forbidden to drink grape wine (which was made and drank by Catholic Gheg). Not enough information about beer.	Coon 1950: 17,36; Durham 1910: 463; Durham 1928: 195,265-266; Hasluck 1954: 40,52-53
SCCS49	Romans	Imperial Romans (EI09)	110	8	8	8	7	2	Romans produced and consumed wine and mead (mulsum). Beer also probably present (or at least known by Romans).	Carcopino 1940: 268-269; Loane 1838: 16-24; Rivenburg 1939: 60-61,65-66,85; Plin. Nat.: 14.29,22.82
SCCS50	Basques	Basques (EX08)	1934	8	8	8	NA	NA	Basque produced and drank cider (from apples); “cider has been made and sold since at least medieval times” (Sevilla 1990: 88). They probably also drank wine (from grapes). Not enough information about beer and distilled beverages. Unfortunately, didn't have access to the main S1 source: Caro Baroja, J. 1944. La vida rural en Vera de Bidasoa	Caro Baroja 1958: 163,193,339-340; Collins 1987: 202; Douglass 1975: 28,87,92,97; Sevilla 1990: 88-104
SCCS51	Irish	Rural Irish (ER06)	1932	8	8	NA	8	8	Only brief mentions of drinks in S1 sources, no comprehensive chapter on intoxicants; but ale-house, brewers and porter, as well as whisky (including home-made "poteen") mentioned. No mentions of wine or mead. However, beer has been brewed in Ireland since at least Celtic times (Meussdoerffer 2009: 8-9).	Arensberg & Kimball 1940: 111-112,177-178,262-263; Evans 1957: 27,119,200,284; Meussdoerffer 2009: 8-9,24-25
SCCS52	Lapps (Sami)	Lapps (EP04)	1950	6	6	NA	6	4	Some Lapps groups produced homebrew (made of sugar, yeast, malt or tea-leaves), but it's not clear how old this tradition is (probably not of indigenous origin, but possible more than 100 years). They have bought liquor since the sixteenth century. No mentions about fermented beverages.	Pehrson 1957: 81-82; Anderson 1978: 165-167,205-207; Collinder 1949: 84; Ingold 1976: 162,169-171; Itkonen 1962[1948]: 66,440,504-507; Itkonen 1972[1948]: 828,1147; Pelto 1962: 152,200
SCCS53	Yurak Samoyed	Nenets (RU41)	1894	4	4	4	3	4	Yurak Samoyed drank alcohol (wine, vodka), but they got it through trade and probably didn't produce it. No mentions of beer.	Engelhardt 1899: 199,204,269,287; Islavin, V. 1953[1847]: 10,30,34,38,41-42; Jackson 1895: 55,94
SCCS54	Russians	Russians (RF10)	1955	8	8	6	8	8	Russians made beer, kvas and vodka. They also drank wine, but is not clear whether they also produced it.	Krupianskaia 1970: 98,108-109; Dunn & Dunn 1988: xxii,29,101-102,121
SCCS55	Abkhaz	Abkhaz (RI03)	1880	8	8	8	NA	7	Abkhaz made grape wine and probably also chacha (vodka distilled from grape skins). No mention of beer.	Janašvili 1963[1894]: 15,28,32,63; Benet 1974: 2,13,25,35,38; Garb 1984: 13,27,36
SCCS56	Armenians	Armenia (RJ01)	1843	8	8	8	2	NA	Armenians produced grape wine. They probably did not produce beer ("The Ossetes, like the Germans, brew beer from barley, and give it the same name; the other Caucasians hardly know of its existence"). The presence of native distilled drink (rakhee or oghee) in FT is possible but uncertain.	Haxthausen 1854: 148-150,209,229-231,389; Villa & Matossian 1982: 23,40,45,54-55,79,180
SCCS57	Kurd	Kurd (MA11)	1951	1	1	1	1	1	"The Kurds of this area are not fond of alcoholic beverages, although a few of the chieftains have experimented with them, and it can almost be stated categorically that no person native to Rowanduz makes use of them. A “secret sinner” (the use of intoxicants is forbidden in the Quran) would have a difficult time." However, wine, beer and distilled arrack are available to them (especially to offi…	Masters 1953: 41,64,87,135-137,305,332
SCCS58	Basseri	Basseri (MA10)	1958	NA	NA	NA	NA	NA	There is no mention of alcoholic beverages in Barth (1961; S1), probably because Basseri are Muslims. However, there's not enough information (e.g. no separate section on beverages or intoxicants).	Barth 1961
SCCS59	Punjabi	West Punjabi (AT03)	1950	1	1	1	1	1	Punjabi are Muslims (for centuries), they probably do not drink alcoholic beverages. Eglar (1960; S1) do not mention any alcoholic drink. Kennedy (1957: 96; S3) and Symonds (1950:180) say it is forbidden. Honigmann (1958: 91; S3) only says that alcohol is used against infection.	Eglar 1960; Honigmann 1958; Kennedy 1957: 96; Symonds 1950: 180
SCCS60	Madia (Gond)	Gond (AW32)	1938	8	8	8	0	7	Hill Maria Gond made salphi (the fermented sap of the sago palm). However, the fermented rice beer - landa (consumed by other Gonds) was taboo to them. They also drank spirit distilled from mahua flower (Bassia latifolia), but home-distillation was forbidden by Government.	Grigson 1949: 136,139,151-152,168-171,334,287; Elwin 1947:49-57
SCCS61	Toda	Toda (AW60)	1900	4	3	3	3	3	Todas had no native intoxicant, but they consumed (unspecified) alcoholic drinks in FT (probably acquired through trade).	Rivers 1906: 476,581; Marshall 1873: 82,90
SCCS62	Santal	Santal (AW42)	1940	8	8	8	8	8	Santal made rice beer, and wine and brandy (the last two made from mahua flowers - Bassia latifolia).	Biswas 1956: 40-42; Culshaw 1949: 29-32,107; Mukherjea 1962: 75-77,91,97-98
SCCS63	Uttar Pradesh	Uttar (AW19)	1945	7	7	7	3	3	High-castes did not drink alcohol, but low-castes produced and drank (indigenous?) wine. No mention of beer or distilled beverages.	Opler & Singh 1954: 472,477-478,484-487; Opler & Singh 1952: 7
SCCS64	Burusho	Burusho (AV07)	1934	8	8	8	2	1	Burusho made wine (from grapes). No mention of beer. In earlier times, they distilled araq (from mulberries), but this was forbidden in FT by their rulers.	Lorimer 1938: 11; Lorimer 1939: 60,181,194-196
SCCS65	Kazakh	Kazakh (RQ02)	1885	8	8	8	8	3	Only few mentions about drinks and intoxicants. Khazak produced and drank kumiss (from milk) and buza (from rice, millet or sorghum). No mention of distilled beverages.	Grodekov 1959[1889]: 38-39,98,230-231; Hudson 1938: 99
SCCS66	Khalka	Mongolia (AH01)	1920	8	8	8	3	8	Khalka made two drinks from mare's milk - fermented Airaga and distilled Airaha. They had also access to traded wine and vodka. No mention of beer.	Vreeland 1954: 28-30,199; Maiskii 1956[1921]: 112-114,145,331; Montell 1937: 321-332
SCCS67	Lolo	Yi (AE04)	1910	8	8	NA	7	4	Lolo made "wine" from the grains (i.e. technically beer?) and they imported distilled liquor from the Han-Chinese region. No clear mention of other (real) wines.	Lin 1960[1947]: 51-52,79; Tseng 1956[1945]: 12; D'Ollone 1912: 45,69-70
SCCS68	Lepcha	Lepcha (AK05)	1937	8	8	3	8	4	Lepcha made beer (from millet, other grain or the pith of different tree-ferns). They also bought distilled arak. No mention of wine.	Gorer 1938: 67,91,96-98,258-259; Morris 1938:36,267-8
SCCS69	Garo	Garo (AR05)	1955	8	8	2	8	2	Garo made beer (from rice, millet, maize or Job’s tears). According to Playfair (1909: 52; S1), they did not produce any distilled beverages in 1908 (and no mention of them in Burling 1963; S1). No mention of wine.	Burling 1963: 37,39,46-47,281-282; Playfair 1909: 4,51-53
SCCS70	Maras (Lakher)	Mara (AR20)	1930	8	8	2	8	8	Mara made two kinds of rice beer (Sahmapi, Sahmahei) and a distilled spirit (Zuri) from those beers. No mentions of wine or other fermented beverages.	Parry 1932: 87-90
SCCS71	Burmese	Burmans (AP04)	1965	7	7	7	4	6	Burmans made palm-wine. In FT, they also had access to (commercial?) beer and distilled spirit (from palm). The origin of the distilled beverage is not clear. In general, drinking was rare due to Budhism. "Intoxication means almost total abstinence from fermented toddy palm juice or country spirits, the distilled white liquor" (Nash 1965: 263). "Drinkers of tári [palm-wine] are few among the Burm…	Scott 1910: 70,146; Nash 1965: 170,255,263,298-299; Ferrars & Ferrars 1901: 84-85; Lieberman 2003: 136-7,196
SCCS72	Lamet	Rmeet (AM28)	1940	8	8	2	8	8	Lamet (Rmeet) made "wine" and distilled brandy (from rice and other grains). No mention of fermented beverages from fruits etc.	Izikowitz 1951:76,240,263,299,302,315
SCCS73	Annamese (Vietnamese)	Vietnam (AM11)	1930	8	7	0	7	8	Vietnamese made alcohol only from rice, including native distilled alcohol (30-35% ABV) and, in some regions, fermented alcoholic food/drink (ruou nep, ruou cai, or men). In general, in Vietnam there is a long tradition of making both undistilled wine and distilled spirit from rice (Thanh & Viet Anh 2016).	Gourou 1953[1936]: 420-421,460,523-529; Thanh & Viet Anh 2016
SCCS74	Rade (Rhade)	Rhade (AM35)	1962	8	7	2	7	NA	Rade made rice "wine". Fom Donoghue et al. (1962, S1), however, is not clear whether this is fermented or distilled beverage (or both). In general, in Vietnam there is a long tradition of making both undistilled wine and distilled spirit from rice (Thanh & Viet Anh 2016). No mention of other alcoholic beverages.	Donoghue et al. 1962: 42,86-87; Hickey 1993:23-25,33; Thanh & Viet Anh 2016
SCCS75	Ancient Khmer	Cambodians (AM04)	1292	8	8	8	8	2	Cambodians made several kinds of "wine" (from honey, leaves of a tree, rice and sugar-cane). No mention of distilled beverages.	Zhou 1902: 170-1
SCCS76	Thai (Siamese)	Central Thai (AO07)	1955	8	8	NA	8	6	Central Thai made alcohol from rice, probably both distilled "whisky" and fermented "wine" (later mentioned only in Kaufman 1960). No mention of other fermented beverages. "[A]lcoholic beverages have been consumed in Thailand for many thousands of years" but due to Buddhism, their consumption was not common until the early Ratanakosin period (after 1782); distillation technique was introduced by …	Goldsen & Ralis 1957: 57; Phillips 1966: 26; Sharp & Hanks 1978: 67,103,146,268n10; Kaufman 1960: 166; Thamarangsi 2006: 783
SCCS77	Semang	Semang (AN07)	1925	0	0	0	0	0	"The Semang are poor in luxuries [..] No alcoholic beverages are available to them since the Mohammedan Malays do not brew any and the neighboring Senoi have never done so."	Schebesta 1962[1954]: 110-111
SCCS78	Nicobarese	Nicobarese (AZ07)	1870	8	8	8	2	4	Nicobarese made palm wine ("toddy" or "tari", from coco-palm sap) and rarely drank imported rum. No mention of beer.	Man 1932: 37-38,110-117,127-128,149; Whitehead 1924: 37-38,67-68,73,90-91,206
SCCS79	Andamanese	Andamans (AZ02)	1860	4	3	3	3	4	Andamanese didn't make indigenous alcohol, but had access to imported "rum and other intoxicating drinks". Before contact, "they were also entirely ignorant of narcotics in any form". The honey was probably consumed only before it started to ferment.	Man 1932: 44,124,160; Radcliffe-Brown 1922: 39-40
SCCS80	Vedda	Vedda (AX05)	1860	0	0	0	0	0	Vedda did not drink alcohol. "They do not smoke, and are very temperate, drinking water only."	Bailey 1863: 291; Seligman & Seligman 1911
SCCS81	Tanala	Tanala (FY08)	1925	8	8	8	7	6	Tanala made "beer" (from honey, sugar cane, bananas, sweet potatoes etc.; "since prehistoric times") and distilled "rum" (from honey, sugar-cane etc.; probably learned from Europeans 150 years ago). Rice beer was made in ancient times, but it is now obsolete.	Linton 1933: 47,60,75-76
SCCS82	Negri Sembilan	Malays (AN05)	1958	1	1	1	1	1	Malays are Muslims since the 15th century. "No form of alcohol whatsoever is drunk" (Firth 1943: 68). The social equivalent of a drink “at the pub” is having a cup of coffee, or tea. No mention of alcohol in Gulick (1958; S1). “Prior to the advent of the Europeans [in the 17th century], there was very little alcohol production or consumption in Malaysia. The Malay sultanates of peninsular Malaysi…	Gullick 1958; Firth 1943: 43,68; Jernigan & Indran 1999: 61-62
SCCS83	Javanese	Javanese (OE05)	1954	7	7	7	7	6	Javanese are Muslims. However, they probably made and consumed wine (from palms, fruit) and rice "wine", but mentions in S1 sources are rare. Distilled beverages were introduced to Java by ca. 13th century (Jákl 2021), but in FT, "only a very small percentage of the population drinks anything stronger than fruit wine" (Geertz 1960: 300).	Geertz 1960: 20,82,299-300,380; Geertz 1975: 80,196; Jay 1969: 325; Koentjaraningrat 1976: 16; Jákl 2021
SCCS84	Balinese	Bali (OF07)	1958	8	8	8	8	6	Balinese made palm-wine (toeak, tuak), rice "wine" (berem, brom) and distilled arak (probably from rice).	Belo 1936: 126; Belo 1953: 22-23,40; Covarrubias 1938: 20,102,109; Geertz 1963: 89
SCCS85	Iban	Iban (OC06)	1950	8	8	NA	8	4	Iban made rice beer (tuak). They bought distilled alcohol (e.g. brandy, whisky, gin, arak) but probably did not produce it themselves. Haddon & Start (1936) mentions the production of palm wine, but it is not certain whether this also applies to Focal Place (other sources indicate that rice beer is the only alcoholic drink).	Freeman 1955: 66,85,102; Gomes 1911: 63,102; Haddon & Start 1936: 133,145; Kedit 1991: 303-304; Sandin 1980: 45,52-55,60,77
SCCS86	Badjau Tawi-Tawi	Sama-Bajau (OA08)	1963	2	2	2	2	2	Badjau chew betel and smoked cigarettes, but they probably did not drink any alcoholic beverages. "Water is the only beverage of the Sama Dilaut, except occasional coconut water".	Nimmo 1972; Nimmo 2000: 102-103; Teo 1989: 63
SCCS87	Toradja	Eastern Toraja (OG11)	1910	8	8	8	6	6	Toradja made palm-wine (baroe), rice beer (pôngasi) and distilled arak (from palm wine). They learned the last two from neighboring Moriers, but it is not stated when.	Adriani & Kruijt 1951[1912]: 80,303,334,340-343,347-349,350-352
SCCS88	Tobelorese	Tobelo (OH18)	1900	8	8	8	2	3	Tobelorese made palm-wine. They maybe also drank imported gin ("jenever"), but there was only one mention of it. No mention of beer.	Hueting 1921: 243,257,286,291; Hueting 1922: 150,205,280-281
SCCS89	Alorese	Alorese (OF05)	1938	0	0	0	0	0	(Pagan mountain, i.e. non-muslim) Alorese avoided intoxicants, even though they knew palm wine (maybe because they were afraid of spirit possession and losing their personality).	Du Bois 1944: 154,156-157,159
SCCS90	Tiwi	Tiwi (OI20)	1929	2	2	2	2	2	No mention of alcohol in eHRAF sources. The only mentioned intoxicant is (traded) tobacco. Although some Australian Aboriginal groups made indigenous fermented beverages, there is no reference of Tiwi being one of them (Maggie Brady, pers. com. 10. 02. 2023).	Hart & Pilling 1960; Goodale 1971; Basedow 1913; Brady 2014
SCCS91	Northern Aranda	Aranda (OI08)	1896	3	3	3	3	3	Murdock (1934) says Aranda made no intoxicating beverages. Also no mention of them in Spencer & Gillen (1927; S1). However, it is possible that they had access to traded alcohol at FT (Radford 1992: 83,90). They made several sweet drinks, but probably non-alcoholic (Basedow 1925: 153).	Spencer & Gillen 1927; Basedow 1925: 153; Murdock 1934: 26; Radford 1992: 83,90; Brady 2014; Brady, Maggie [pers. com. 10. 02. 2023]
SCCS92	Orokaiva	Orokaiva (OJ23)	1925	2	2	2	2	2	Williams (1930; S1) has a section "Stimulants" (including betel and tobacco), but alcohol is not mentioned. "All available evidence indicates that no traditional alcoholic beverages were made in Papua New Guinea" (Marshall 1980: 1). Moreover, "’natives’ were prohibited from possessing or consuming alcoholic beverages" from 1880s to 1962 (ibid. 4)	Williams 1930; Marshall 1980; Schwimmer 1982
SCCS93	Kimam	Kimam (OJ82)	1960	2	2	2	2	2	No mention of alcohol, although there is a whole section on "Narcotics and stimulants" in Serpenti (1965; S1).	Serpenti 1965
SCCS94	Mee (Kapauku)	Kapauku (OJ29)	1955	0	0	0	0	0	"Kapauku are not familiar with intoxicating beverages" (Pospisil 1963; S1).	Pospisil 1963: 364
SCCS95	Kwoma	Kwoma (OJ13)	1937	2	2	2	2	2	No mention of alcoholic beverages, although other intoxicants (tobacco, betel) are mentioned.	Whiting 1941; Whiting 1970; Whiting & Reed 1938
SCCS96	Manus	Manus (OM06)	1929	0	0	0	0	0	No mention of alcoholic beverages in Mead (S1), although other intoxicants (tobacco, betel) are mentioned. "Prior to the presence of Europeans, natives of the Admiralties [..] had no knowledge of fermented, alcoholic drinks." (Schwartz & Romanucci-Ross 1974: 218). During FT (from ca. 1914 to 1962), “laws prohibiting [alcohol] consumption and sale to natives were in effect" (Schwartz & Romanucci-R…	Mead 1930; Mead 1934; Mead 1937; Mead 1956; Schwartz & Romanucci-Ross 1974
SCCS97	Lesu (New Ireland)	Lesu (OM24)	1930	0	0	0	0	0	Lesu did not drink alcoholic beverages. "Alcohol, opium and firearms are not used by the natives of this study" (Powdermaker 1931: 371n28).	Powdermaker 1931: 371n28; Powdermaker 1933: 156
SCCS98	Trobriands	Trobriands (OL06)	1914	0	0	0	0	0	"Alcohol is unknown: the Trobrianders have no intoxicating drink and have not learnt to ferment palm sap or cane juice" (Silas 1926: 194).	Malinowski 1922; Malinowski 1929: 452; Malinowski 1935; Silas 1926: 194
SCCS99	Siuai	Siwai (ON19)	1939	2	2	2	2	2	No mention of alcoholic beverages, although other intoxicants (tobacco, betel) are mentioned. According to Oliver (1955; S1), Siuai's only drinks were water, broth and coconut water/milk.	Oliver 1955: 27
SCCS100	Tikopia	Tikopia (OT11)	1930	0	0	0	0	0	Tikopia made one fermented drink (tai; from coconut), but it was not used as an intoxicant. "The ordinary drinks in Tikopia are simple--water and coconut milk [..] There are no intoxicants in the island" (Firth 1936: 108).	Firth 1936: 108; Firth 1970: 363
SCCS101	Bunlap (Pentecost)	Sa (OO17)	1953	3	3	3	3	3	No intoxicants or drugs are mentioned in Lane & Lane (1957; S1), although the eHRAF Culture Summary mentions the presence of Kava. Muller (1975) in his article on agriculture and food preparation mentions only tobacco and kava (the latter of recent introduction) => native alcohol probably absent (but lack of information on any traded alcohol)	Lane & Lane 1957; Muller 1975
SCCS102	Mbau Fijians	Bau Fijians (OQ12)	1840	4	3	3	3	4	There are a few mentions of alcoholic beverages (e.g. rum, "spirituous liquors") in Waterhouse (1866), but apparently these are not local products. "I know of no alcoholic drink existing in Fiji prior to contact. Some fermented foods were eaten but the fermentation of drinks was not known. Immediately after contact, rum and whisky began to circulate..." (Walter 1982: 433)	Waterhouse 1866: 97-98,322,339-340; Walter 1982: 433
SCCS103	Ajie	Kanak (OP04)	1845	4	4	4	3	4	In the mid-19th century, alcohol (e.g. wine, spirits) was imported. Indigenous alcohol seems to be absent.	Connell 1987: 26,91
SCCS104	Maori	Maori (OZ04)	1820	3	3	3	3	3	Several sources mention the presence of alcohol in Post-Focal time (ca. 1900). In pre-contact period, the only drink known to the Maori seem to be water. "Water was the only drink known to the Maori of yore" (Best 1924; S1).	Best 1924: 434; Buck 1952: 377; Earle 1832: 10,251; Firth 1959: 437; Hawthorn 1944: 30-31,47,89,109
SCCS105	Marquesans	Marquesas (OX06)	1800	3	3	3	3	3	Presence of alcohol in FT (1800) is unknown, but it was probably introduced in the Post-contact period. Marquesans made fermented breadfruit, so they knew fermentation.	Handy 1923: 5; Linton 1939: 175-176
SCCS106	Upolu Samoans	Samoans (OU08)	1829	0	0	0	0	0	"They had no fermented liquors" (Turner 1884; S1). "Kava was the only beverage the pre-European Samoans had besides water and coconut water" (Buck 1930; E1). They made fermented breadfruit, so they knew fermentation. Several mentions of native home-brew, but only from the Post-Focal period (ca. 1920).	Turner 1884: 113; Buck 1930: 163; Keesing 1934: 239,253-254,442
SCCS107	Makin (Gilbertese)	Kiribati (OR06)	1890	5	5	5	3	4	Makin (Kiribati) made "sour toddy" (fermented coconut sap), but they learned its production from Europeans (in 1840s). A few mentions of traded spirits (gin, brandy, whisky, rum). No mention of beer.	Lambert 1966: 167; Lambert 2018: 4; Grimble 1989: 92-95,330-331; Koch 1986: 58-59,111,115; Maude & Leeson 1965: 428-429; Marshall & Marshall 1975: 455-458
SCCS108	Marshallese	Marshallese (OR11)	1900	5	5	5	4	4	Production of palm wine (fermented coconut sap) was learned from the Gilbertese (in the second half of the 19th century). "Finsch, who was in the Marshalls from 1879 to 1885, has written that the Marshallese did not often make fermented toddy because by that time they could buy sufficient quantities of Hamburg gin and beer which they preferred." After FT [1940s], the wine was also distilled.	Erdland 1961[1914]: 10-11; Krämer & Nevermann 1961[1938]: 201,314-315; Mason 1947: 69,77; Spoehr 1949: 143-144; Carucci 1987: 9-10
SCCS109	Trukese	Chuuk (OR19)	1947	5	5	5	4	4	Trukese made palm wine, however, they learned the fermentation process relatively recently (the first alcoholic drinks were introduced in the 1890s). Imported beer and distilled beverages also mentioned.	Gladwin & Sarason 1953: 241,289; LeBar 1963: 223-225; Bollig 1967[1927]: 157,180,182,201-202; Marshall 1979: 36-38,40-41,47,51-52; Marshall & Marshall 1990: 6,30-32
SCCS110	Yapese	Yap (OR22)	1910	3	3	3	3	3	Yapese probably lacked alcohol until sometime in the 19th century. After it was introduced, they drank a lot. However, in Focal Time, alcohol prohibition had been imposed by the Government (but uncertain how strictly enforced).	Furness 1910: 11,17,49,117; Müller 1917: 13,116; Salesius 1963[1906]: 77,106,111-113,190; Senfft 1962[1903]: 2,15; Marshall & Marshall 1975: 445-450
SCCS111	Palauans	Belau (OR15)	1947	6	6	6	NA	6	Palauans lacked alcohol until sometime in (the first half of?) the 19th century (or later at 1910s?). Specifically mentioned are production of fermented coconut toddy, and homemade liquor distilled from a mash of tapioca roots. One mention of "rice wine" (but its origin unknown). => alcohol possibly introduced more than 100 years before FT	Barnett 1949: 89,127,170,195; Barnett 1963: 13; Marshall & Marshall 1975: 444-450,460; Nero 1990:72-73,78
SCCS112	Ifugao	Ifugao (OA19)	1910	8	8	3	8	4	Ifugao made rice "wine" (with added sugar cane). Gin drinking mentioned, but probably not produced locally. No mention of fermented beverages (i.e. real wines).	Barton 1922: 404,407; Barton 1946: 24,129,131; Barton 1955: 158n5,171; Barton 1911: 83-84,88; Lambrecht 1932-1941: 219-220; Villaverde 1909: 241,252-253; Gibbs & Agcaoili 1912: 103-106
SCCS113	Atayal	Atayal (AD08)	1930	7	7	2	7	2	Atayal probably made beer (from millet or/and rice). No mentions of other alcoholic beverages. Only S3 sources consulted.	Beauclair 1956: 156; LeBar 1975: 144,147; Rui et al. 1955: 122
SCCS114	Chekiang (Chinese)	Han Chinese (AE15)	1936	8	8	NA	8	8	Han Chinese made millet beers, rice "wines" and distilled spirits (shaojiu; from sorghum?). Not enough information about fermented beverages.	Fei 1946: 88,173,249; Fei 1979; Dikötter et al. 2004: 14-16
SCCS115	Manchu	Manchu (AG01)	1915	8	8	8	8	8	Manchu distilled alcohol from cereals (e.g. sorghum, millet, barley) since the 17th century. They also made wine from grapes and "wine" from rice and millet.	Shirokogorov 1924: 91,149; Hoshino 1921: 149-150,153,177,183,187-189; Isett 2007:214, 216n10,257; Smith 2012: 1-16,22-26
SCCS116	Koreans	Korea (AA01)	1947	8	8	3	8	8	Koreans made "wine" and distilled spirit from rice. No mention of real wines.	Osgood 1951: 64,82,88-90,229-230
SCCS117	Japanese	Okayama (AB43)	1950	8	8	3	8	8	Japanese made sake (rice wine) and shōchū (distilled rice wine). No mention of real wines.	Beardsley et al. 1972: 68,106,110; De Vos 1973: 65,73-74,87; Cornell 1956: 198
SCCS118	Ainu	Ainu (AB06)	1880	6	6	3	6	4	Formerly, Ainu made millet beer, but the Japanese government prohibited it. The history of the beer is not clear, it is possible they learned it from Japanese (see Hitchcock 1891: 458). In FT, they drank (probably imported) saké and shōchū. No mention of real wines.	Batchelor 1927: 39,168,172-173,211,298; Hitchcock 1891: 458-461; Bachelor 1901: 28,110,170,247-248,486; Munro 1963: 2,37,42-43,48,69-71,75-76,81,91,123,170-171; Murdock 1934: 168
SCCS119	Nivkh (Gilyak)	Nivkh (RX02)	1890	4	4	4	3	4	Nivkh didn't make alcohol themselves, but they drank kumiss (from city) and Chinese and Russian spirits. Not enough information about beer.	Shternberg 1964[1933]: 105,111,173,180-181,540; Black 1973: 5,39; Seeland 1953[1882]: 15,28,37,40; Shrenk 1964[1881-1895]: 571,714-720,939
SCCS120	Yukaghir	Yukaghir (RV03)	1850	4	3	3	3	4	Yukaghir probably made no alcohol. The only mentions are of traded brandy.	Graburn & Strong 1973: 43; Jochelson 1975: 331,432
SCCS121	Chukchi (Chukchee)	Chukchee (RY02)	1900	4	3	3	3	4	Chukchee drank distilled alcohol obtained by trade with Russians (they didn't distill it by themselves). No mention of wines or beers. "Fly-agaric is the only means of intoxication discovered by the natives of northeastern Asia."	Bogoraz 1904: 23,55,60-62,205,207-208,427-428,644,711-712
SCCS122	Deg Xit'an (Ingalik)	Ingalik (NA08)	1885	4	3	3	3	4	Deg Xit'an most likely didn't know alcohol before the contact. In FT, they were buying alcohol (and maybe even making it, but that's not certain). There is no mention of alcohol in Osgood (1958, 1970; S1). Only "liquor" and "rum" mentioned in VanStone (1979).	Osgood 1958; Osgood 1970; VanStone 1979: 90,111-112,117,191
SCCS123	Aleut	Aleut (NA06)	1824	4	3	3	3	4	Prior to European contacts (in the second half of the 18th century) the Aleuts knew no alcoholic beverages. Later they learned to produce alcohol (kvass) themselves (Berreman 1956: 504-5), but it is not certain whether this was before FT [1824] - Veniamov (1840; S1) does not mention it. "They knew nothing of intoxicating drinks until the arrival of the Russians [..] The Aleuts call vodka and all …	Veniamov 1840: 52-54,236,244; Berreman 1956: 504-505; Coxe 1804: 229
SCCS124	Copper Inuit	Copper Inuit (ND08)	1915	2	2	2	2	2	Copper Inuit had no native alcohol. Foreign alcohol was introduced probably after Focal Time. Jenness (1922; S1) mentions only two beverages: water and broth.	Jenness 1922: 106,242
SCCS125	Montagnais	Innu (NH06)	1910	4	4	4	4	4	Montagnais made no indigenous alcohol, but they had access to traded alcoholic beverages (although officially forbiden), including wine, whisky, brandy, and probably also beer ("spruce beer", "porter"). However, cf. Tanner (1944: 675): "The Naskaupee have known the art of producing intoxicating drinks from berries and could do this in a few hours. How they made the juice ferment even in winter is…	Speck 1935: 28,49,94,181-182; Lips 1947: 446; Turner 1894: 304; Lane 1952: 10; but cf. Tanner 1944: 675-676
SCCS126	Mi'kmaq (Micmac)	Mi'kmaq (NJ05)	1650	4	4	4	3	4	Mi'kmaq had no indigenous alcohol, but drank imported wine and brandy. There is a mention of "spruce beer" (made of spruce, yeast and molasses) in post-Focal Time (ca. 1700), but apparently only the non-alcoholic version ("spruce tea") was indigenous.	Denys 1908: 444-447,449-450; Le Clercq 1910: 109,253-258; Bock 1966: 8-9,80; Wallis & Wallis 1955: 66-67; Wallis & Wallis 1953: 116
SCCS127	Northern Saulteaux	Ojibwa (NG06)	1930	4	4	4	4	4	Northern Saulteaux made no indigenous alcohol. Maybe they learnt to make a "home-brew", but this is uncertain for Focal Time and Place. Anyway, they drank purchased alcohol since 17th century (probably all kinds - wine, beer, spirits).	Hallowell 1955: 119,141-142; Hilger 1939: 35-36,122-125; Kinietz 1947: 138-141; Bishop 1974: 128-132, 240-241
SCCS128	DeneTha (Slave)	Slavey (ND14)	1940	6	6	6	6	4	DeneTha had probably no indigenous alcohol. However, they made "brew" (of yeast, molasses, sugar, dried currants, and water; or cornmeal, raisins, dried fruits); date of its introduction is unknown but probably no earlier than the 19th century (yet possibly more than 100 years before FT). In the past, they also produced distilled "moonshine", but the manufacture was abandoned in FT. Only rarely t…	Helm 1961: 29-30,97-98,102-107,109,112; Honigmann 1946: 35,111
SCCS129	Kaska	Kaska (ND12)	1900	3	3	3	3	3	Kaska have learned the process of fermentation from white men after FT (ca. around 1920). By mid-1940s they frequently prepared their own fruit wine and malt beer. Whiskey and rum were purchased. Although Honigman did his fieldwork in the 1940s, the FT is reconstructed for 1900, just prior to intensive missionization.	Honigmann 1949: 53,107,109,150,168-169
SCCS130	Eyak	Eyak (NA07)	1890	5	5	3	5	4	Before the Russians came (ca. 1790s), Eyak had no fermented beverages. However, at 1930s they made beer and obtained liquor from the local bootleggers. No mention of wine.	Birket-Smith & De Laguna 1938: 98,143,161; De Laguna 1990: 194-195
SCCS131	Haida	Haida (NE09)	1875	4	3	3	3	4	Haida had no indigenous alcoholic beverages, but they drank purchased hard liquor. In period after FT (1876 - 1900), they made home-brew (from syrup, berries and potatoes); whether they produced it already in 1875 is uncertain (van den Brink 1974: 62). No mention of wine. "They possess no native alcoholic beverages, nor did they smoke until taught by the whites" (Murdock 1934: 226; S1). No mentio…	Murdock 1934: 226,261; Swanton 1905; van den Brink 1974: 22-23,32-33,42-43,47-48,51,62
SCCS132	Nuxalk (Bellacoola)	Nuxalk (NE06)	1880	4	3	3	3	4	Nuxalk had no indigenous fermented drinks. In 1920s, they manufactured home-brew "wine", but it is not certain when they learned it. Traded alcohol (whisky) was probably available at FT. No mention of beer.	McIlwraith 1948a: 179,286,609; McIlwraith 1948b: 194,257-258,283,530-531
SCCS133	Twana	S. C. Salish (NR26)	1860	4	3	3	3	4	Twana probably made no native alcoholic drinks (but cf. Smith 1940: 252 for post-contact fermented drink from salmon berries). They sometimes got alcohol (e.g. whisky) from whites. No mentions of beer or wine. No mention of alcohol in Elmendorf (1960; SCCS).	Elmendorf 1960; Eells 1877: 64; Smith 1940: 163,525; Smith 1963: 32,37
SCCS134	Yurok	Yurok (NS31)	1850	4	3	3	3	4	Yurok had no native alcohol and only rarely drank the “firewater” of the whites. No mentions of wine or beer.	Heizer & Mills 1952: 149,167,180; Kroeber 1925
SCCS135	Eastern Pomo	Pomo (NS18)	1850	3	3	3	3	3	Pomo made no use of intoxicating drinks before the coming of the whites. However, it is possible (though uncertain) they had access to traded whisky in FT [1850]. No mentions of wine or beer.	Barrett 1908: 61; Barrett 1952: 95; Kroeber 1953: 270; Loeb 1926: 173,214,297
SCCS136	S. Valley Yokuts	Yokuts (NS29)	1850	3	3	3	3	3	Indigenous alcoholic drinks were probably absent. Several non-alcoholic beverages mentioned, including Manzanita cider which "was no longer thought fit to drink" if it fermented. It is possible (though uncertain) that Yokuts had access to traded whisky in FT [1850]. No mention of alcoholic drinks in Gayton (1948; S2) in section "Beverages" and "Pleasures".	Gayton 1948: 77-78,170,176,181-182,222; Latta 1949: 125,217,223
SCCS137	Wadadokado (Paiute)	Northern Paiute (NR13)	1870	3	3	3	3	3	Northern Paiute had no indigenous fermented beverages and intoxicants. In 1930s, they had access to traded alcohol, but whether they drank alcohol in FT [1870] is not certain. "Fermented beverages and intoxicants were unknown" (Kelly 1934: 103; E1)	Kelly 1934: 103; Whiting 1950: 24-25
SCCS138	Klamath	Klamath (NR10)	1860	4	3	3	3	4	Native alcohol was probably absent (no mention in Spier 1930; S2, althoug he has a whole section on Tobacco). The Treaty of 1864 prohibited the sale and use of liquors upon the Reservation (Gatschet 1890; S2), hence Klamath probably acquired alcohol by trade before it (in the 1860s).	Spier 1930; Gatschet 1890: lxi,lxiv
SCCS139	Kutenai	Kutenai (NF08)	1890	3	3	3	3	3	Kutenai knew European whiskey (they had a word for it), but whether they consumed alcohol in 1890 [FT] is uncertain (giving or selling of intoxicating liquors to the Indians was prohibited by the law). Nevertheless, they probably didn't have any indigenous alcohol.	Turney-High 1941: 176-177; Schaeffer 1965: 213; Chamberlain 1892: 552-553,574,595
SCCS140	Gros Ventre	Gros Ventre (NQ13)	1880	4	3	3	3	4	Gros Ventre had probably no indigenous alcohol. Whisky obtained via trade. No mentions of wine or beer.	Flannery 1953: 7-8,18-19,61,77,80-81
SCCS141	Hidatsa	Hidatsa (NQ14)	1836	NA	NA	NA	NA	NA	Some alcohol (probably traded) present, but there is not enough information. No mention of alcohol in Wilson (1987; S1), although he has a section on Tobacco.	Wilson 1987; Bowers 1965: 45,74,121-122; Matthews 1877: 238
SCCS142	Pawnee	Pawnee (NQ18)	1867	4	3	3	3	4	Pawnees occasionally had access to whiskey [in 1870s], but they drank only rarely. No mention of native alcoholic drinks (-> probably absent). No mentions of wines and beers.	Weltfish 1965; Blaine 1990: 10-11; Reid & Beierle 1998: 3; Smith 1852: 93
SCCS143	Omaha	Omaha (NQ21)	1860	4	3	3	3	4	Beer, wine, or other fermented juices, and distilled liquors, were unknown to pre-contact Omaha. In FT, however, they had access to traded liquor (e.g. rum, whisky).	Dorsey 1884: 309,369-370 Fletcher & La Flesche 1911: 618-619; Fortune 1932: 31,104-105,139-140
SCCS144	Huron	Huron/Wendat (NG05)	1634	2	2	2	2	2	"There is no reference to the Huron drinking, or attempting to obtain alcoholic beverages, at this time [1615 - 1629 AD]. While they may have consumed a small amount of alcohol when they visited the trading places along the St. Lawrence, they evidently did not think it worth the trouble to carry wine or spirits home with them" (Trigger 1976: 433; S3).	Kinietz 1940: 36; Trigger 1969; Trigger 1976: 433,462,569
SCCS145	Muscogee (Creek)	Creek (NN11)	1800	NA	NA	NA	NA	4	Muscogee (Creek) drank traded strong liquors. No mention of indigenous alcohol in Swanton (1928), but cf. Abbott (1996: 7) for the possibility that they prepared a mildly intoxicating drink from berries. Bacon et al. (1965) also report presence of aboriginal alcohol.	Swanton 1928a: 538; Swanton 1928b: 393, 433; cf. Abbott 1996: 7; Bacon et al. 1965: 99
SCCS146	Natchez	Natchez (NO08)	1718	4	4	4	3	4	No mention of indigenous alcohol, but Natchez drank French brandy and probably also French wine. They also made (non-alcoholic) "black drink". No mention of beer.	Swanton 1911: 78,119,225,229; Barnett 2007: 26,93,99,106
SCCS147	Comanche	Comanche (NO06)	1870	4	3	3	3	4	"the Comanches did not know how to brew beer or ferment wines from their grapes" (Wallace & Hoebel 1952: 74; S1). However, they probably had access to traded whisky in FT.	Hoebel 1940; Wallace & Hoebel 1952: 74,112,267-268
SCCS148	Chiricahua	Eastern Apache (NT08)	1870	6	6	6	6	3	Alcoholic beverages were made from mescal, sotol, mesquite, and, more recently, from maize and wheat; all were probably learned from other Native Americans. The date of introduction is unknown, but some were "very old" (Castetter & Opler 1936: 53). Not enough information about distilled drinks.	Opler 1941: 178,248-249,349,368-370,436; Castetter & Opler 1936: 49-53
SCCS149	Zuni	Zuni (NT23)	1880	6	6	6	3	4	In 1879, traded whisky was available, but only rarely used by the Zuni. Formerly they prepared fermented mescal drink (learned from their neighbors?), but they abandoned its production. No mention of beer.	Stevenson 1904: 253-254,263,369; Cushing 1920: 237n23; Waddell & Everett 1980: 22-23; Abbott 1996: 5
SCCS150	Havasupai	Havasupai (NT14)	1918	3	3	3	3	3	Indigenous alcohol probably absent (no mention in Spier 1928; S1, although he has several pages on Agriculture, Wild Food Products and Preparation Of Food). Moreover, Smithson (1959: 50) indicates that alcohol was introduced to Havasupai (sometime before 1950s, but it is not clear whether it was before FT).	Spier 1928; Smithson 1959: 50; Abbott 1996: 4-5
SCCS151	Tohono O'odham (Papago)	O'odham (NU79)	1910	8	8	8	3	4	Tohono O'odham made several native fermented drinks from cactuses, however, they didn't consume them very often (probably only once a year during "rain ceremony"). In FT, they also had access to traded whiskey and brandy. No mention of beer.	Lumholtz 1912: 47-48,57-60,74-75,119-120,125,291; Underhill 1936: 2,10-11,45-47,51; Underhill 1939: 70,97-98; Underhill 1946: 41-45,66-67,153-4,161; Castetter & Underhill 1935: 26
SCCS152	Huichol	Huichol (NU19)	1890	8	8	NA	8	6	Huichol made corn beer, "wine" from corn-stalks and several distilled beverages (e.g. from sotol, guayabas, corn beer). The knowledge of distillation probably introduced in 16th/17th century. Traded grape wine present in 1930s.	Lumholtz 1898: 11-4; Lumholtz 1973: 13,47,182-7,253,278-279; Zingg 1938: lxiv-lxvi,272-273,412,690-692
SCCS153	Aztec	Aztec (NU07)	1520	8	8	8	2	2	Aztecs made fermented drink "octli" (pulque) from the agave sap. No mentions of other alcoholic drinks.	Durán 1971: 309-311; Motolinía 1951: 96,178-179,331-334; Soustelle 1961: 104,155-157; Vaillant 1944: 69,133-134
SCCS154	Sierra Popoluca	Popoluca (NU30)	1940	6	6	6	6	6	Foster (1942, 1945; S1) provides little information on intoxicants. In FT, alcohol (e.g. beer, wine, aguardiente, tequila) was present; however, it is not certain whether obtained only by trade or also locally produced. In distribution map of traditional Mexican fermented beverages (Ojeda-Linares et al. 2021: Fig. 4), there is no evidence for the area of Soteapan.	Foster 1942: 46-47,50,62,73,110-111,113; Foster 1945: 178,180; Ojeda-Linares et al. 2021: Fig. 4
SCCS155	K'iche' (Quiche)	Quiché Maya (NW10)	1930	8	8	8	NA	6	K'iche' made two drinks - chicha (from fermented fruits and berries) and aguardiente (distilled from brown sugar). Chicha was indigenous, aguardiente was introduced (date unknown). Commercial beer maybe also present, but not enough information.	Bunzel 1952: 1n1,140,172,252-260,335,430; Rodas et al. 1940: 43,84
SCCS156	Miskito	Miskito (SA15)	1921	8	8	8	8	4	Miskito made many kinds of alcoholic drinks (e.g. from tubers, maize, fruits, bananas, palm sap etc.). They do not appear to have known how to distill, but they had access to traded aguardiente or rum.	Conzemius 1932: 90,98-101,104,161; Coe & Anderson 1997: 172,181,185
SCCS157	Bribri	Talamancans (SA19)	1917	8	8	7	8	2	Bribri's indigenous drink chicha was made from a variety of foodstuffs (e.g. maize, plantains, pejibaye, yuca, ñampi, or pumpkin). Non-maize varieties of chicha (e.g. pejibaye palm) mentioned only by Stone (1962; S2). Bribri also made "stimulating drink" from fermented cacao, but it's not clear whether it was alcoholic. No mention of distilled beverages.	Skinner 1920: 67,93-95; Gabb 1876: 492,501,510,520-522; Stone 1962: 12,16,23,31,68-69
SCCS158	Guna (Cuna, Tule)	Kuna (SB05)	1927	8	8	7	8	4	Guna made chicha (from sugar-cane juice and corn or bananas and plantains), and possibly also "pineapple beer" and "liquor" made from fermented sap of "Bibby-Tree". They also drank imported rum.	Nordenskiöld 1938: 60,64-65,133,245,251-255,273-275; Stout 1947: 26,35-37,61-62,93-96; Densmore 1926: 22; Wafer 1934: 15,53-54,90-91,98,100,174
SCCS159	Wayuu (Goajiro)	Goajiro (SC13)	1947	8	8	NA	8	4	Wayuu (Goajiro) made chicha (from corn or cassava). They also drunk traded rum and other liquor. Not enought information about wine or other fermented drinks.	Armstrong & Métraux 1948: 370,373-374,376,381-382; Gutiérrez de Pineda 1960[1950]: 10,60,106,179,194,237,269-270; Pineda Giraldo 1961[1950]: 6,16,23,47; Bolinder 1957: 66,109,127,134,142
SCCS160	Haitians	Haitians (SV03)	1935	6	NA	4	NA	6	Haitians distilled rum (clairin or tafia) from sugarcane; they learned distillation process from the French in ca. 18th century (i.e. more than 100 years ago). They also drank wine, but it is uncertain whether they produced it locally. No other drinks mentioned.	Herskovits 1937: 44,85-86,93,113-114,181; Métraux 1951: 119,142-143
SCCS161	Callinago	Island Carib (ST13)	1650	8	8	7	8	2	Callinago made several alcoholic drinks from tubers (mostly cassava, but also sweet potatoes or yams). They may also have produced palm wine and several fermented drinks from fruits (Hodge & Taylor 1957: 530-4,538,557,577-8). No mention of distilled beverages.	Breton & de la Paix 1958[1929]: 3,5,19-20; Breton 1958[1665]: 10-12,34-37; Rouse 1948: 555,560-561; Hodge & Taylor 1957: 530-534,538,557,575,577-578,598
SCCS162	Warao (Warrau)	Warao (SS18)	1935	7	7	7	6	4	Warao made palm wine, probably indigenous. They also made fermented drink from sugar cane and cassava beer, the knowledge of which could be introduced (see Wilbert 1972:95: "Homemade alcohol is relatively recent"). They also had access to traded wine and rum.	Turrado Moreno 1966[1945]: 41,71-72,97,110,113,115-116,122-125,186-187; Wilbert 1972: 94-95; Kirchhoff 1948: 871,879
SCCS163	Yanomami	Yanoama (SQ18)	1965	2	2	2	2	2	According to two E1 sources (Baker 1953: 452; Wilbert 1963: 208), Yanomamo did not prepare any alcoholic beverage. Chagnon (1968: 30; S1) mentions "mead", but this was probably unfermented honey water.	Chagnon 1968, Baker 1967[1953]: 452; Wilbert 1963: 208
SCCS164	Barama River Carib	Barama River Carib (SR09)	1932	8	8	8	8	2	Cassiri and paiwari (both from cassava) are the most popular alcoholic drinks. Barama also made drinks from fermented pineapple juice (tanemu), cane juice, and field corn. No mention of distilled beverages.	Gillin 1936: 17-19,60-62,65
SCCS165	Saramaccan	Saramaka (SR15)	1928	4	3	3	3	4	Kahn (1929) saw no evidence of a native fermented drink in their villages. However, they had access to traded rum. Not enough information about the presence of other alcoholic beverages in FT.	Kahn 1929: 478; Herskovits & Herskovits 1934: 72,179,190,212,253,286,302; Price & Price 1991: 198,326
SCCS166	Munduruku	Mundurucu (SQ13)	1850	0	0	0	0	0	The Mundurucú had no indigenous alcoholic beverages. In FT, they probably didn't even use traded alcohol. "They do not appear to use alcoholic beverages or to become intoxicated" (Tocantins 1959[1877]: 41).	Murphy 1960: 8-9; Tocantins 1959[1877]: 41; Horton 1948: 274
SCCS167	Cubeo	Tucano (SQ19)	1939	8	8	8	8	4	Cubeo made chicha beer (primarily from cassava, but also from "pupunha" palm fruit etc.). They probably also had access to commercial aguardiente, but cf. Silva (1970[1962]: 329) for possible local distillation.	Goldman 1963: 47,64,86,196,202-218,247-248; Silva 1970[1962]: 324-329,513
SCCS168	Chachi (Cayapa)	Chachi (SD06)	1908	6	6	6	NA	6	Chachi made both fermented and distilled drinks from sugar-cane. However, this plant was introduced to them (date unknown, sometime after 16th century) and there's no mention of them making any other drinks. "When sugar-cane was first introduced among the Cayapa, rum was not made, but the fermented guarapo was much drunk" (Barrett 1925: 87) => alcohol introduced probably more than 100 years befor…	Barrett 1925: 61,82,85-92,357,405-406; Altschuler 1965: 19-20,125,216
SCCS169	Shuar (Jivaro)	Jivaro (SD09)	1920	8	8	8	8	4	Shuar made "manioc-beer" from cassava. In February and March, they also made "chontaruru-beer" from peach palm fruits. Karsten also mentions "distillation" of "manioc-wine" (but the process is rather extraction). In FT, they also probably had access to traded brandy.	Karsten 1935: 62,96-97,121-122,130,193-197,327-331,339-340,358-359,499-501; Harner 1973: 51-55,62,66; Rivet 1908: 69,245-246,255,591-292
SCCS170	Amahuaca	Amahuaca (SE06)	1960	NA	NA	NA	NA	NA	No mention of alcoholic beverages in Carneiro's studies (1962;1964;S1). According to Woodside (1981; S2), Amahuaca made manioc beer in 1970s. However, Dole (1994: 34) says "As part of recent changes, Amahuaca in the riverine communities [..] have borrowed [..] strongly alcoholic manioc beer [..] from the nearby Conibo and Campa". Similarly, "At the time of Carneiro and Dole’s research in 1960 Ama…	Carneiro 1962; Carneiro 1964; Woodside 1981: 186,214-224,Tab. 9; Dole 1994: 34; Hewlett 2014: 37,50,116-9,174; Lamb 1981: 578
SCCS171	Inca	Inca (SE13)	1530	8	8	8	8	0	The Inca made a number of fermented drinks (chicha) from different cultivated plants (maize, quinoa, ocas, and molle berries [Schinus Molle]), but had no distilled liquor.	Cieza de León 1864: 151-152,395-397; Cobo 1961[1893]: 121,169-170; Rowe 1946: 283,292-293
SCCS172	Aymara	Aymara (SF05)	1940	8	8	7	8	4	Aymara made various forms of fermented chicha (from quinoa, maize, or barley), and maybe also a fermented drink from molle berries [Schinus Molle]; La Barre 1948: 66). They also drank commercially distilled liquors.	Tschopik 1946: 557; Tschopik 1951: 157-158,180,245,257-258; La Barre 1948: 48-49,65-66,183,186
SCCS173	Sirionó	Siriono (SF21)	1942	8	8	NA	8	2	Siriono made native "mead"/"beer" (from a mixture of honey and maize/cassava/sweet potato). Although honey was an essential ingredient, technically it was probably more of a beer. No mention of pure mead. No mention of distilled beverages.	Holmberg 1950: 28,37-39,62,83
SCCS174	Nambikwara	Nambicuara (SP17)	1940	8	8	8	7	2	Nambikwara made "pineapple wine" and probably also beer from cassava or maize. No mention of distilled beverages.	Lévi-Strauss 1948: 368; Roquette-Pinto 1959[1938]: 28-30
SCCS175	Trumai	Trumai (SP23)	1938	2	2	2	2	2	Trumai probably had no alcohol: “No intoxicating beverages were made” (Murphy & Quain 1955: 31); but see the same ref. for possible presence of alcohol among neighboring tribe Yuruna.	Murphy & Quain 1955: 31
SCCS176	Canela (Timbira)	Canela (SO08)	1915	4	3	3	3	4	Canela probably had no indigenous alcoholic beverages. In 1920s, they had access to traded distilled liquors.	Nimuendaju 1946: 160,175,216-217; Crocker 1990: xi
SCCS177	Tupinambá	Tupinamba (SO09)	1550	8	8	7	8	2	Tupinamba made beer from cassava and from maize. They also probably made many other intoxicating drinks, e.g., from palms, bananas, honey, etc. (see Staden 1928: 141n75). No mention of distilled alcohol.	Staden 1928: 141-142; Thevet 1878: 121; Lery 1956[1880]: 148-149,152; Soares de Souza 1956[1851]: 169,318,320; Métraux 1948: 102,127
SCCS178	Aimoré (Botocudo)	Botocudo (SN02)	1884	4	3	3	3	4	Aimoré (Botocudo) had no indigenous alcoholic beverages (Ehrenreich 1887: 29). However, in FT, they had access to distilled drinks (e.g. cachaça).	Nimuendajú 1946; Ehrenreich 1887: 12,26,29,35; Keane 1884: 206-207
SCCS179	Shavante	Xavante (SP26)	1958	4	3	3	3	4	Maybury-Lewis (1967: 66) mentions drinking alcohol only once and does not specify the type of beverage or its origin. Elsewhere (Maybury-Lewis 1965: 342), however, says the Gê (that includes Xavante) “had no alcohol of any sort until they were tempted to start drinking the raw spirit which Brazilian woodsmen brew from sugar-cane in the interior." Also Coimbra et al. (2001: 233) says: “The [pre-co…	Maybury-Lewis 1967: 66; Maybury-Lewis 1965: 342-3; Coimbra et al. 2001: 233,237
SCCS180	Aweikoma (Xokleng)	Xokleng (SM03)	1932	8	8	8	NA	4	Aweikoma (Xokleng) made "honey beer" (technically probably mead) from honey, water and other ingredients. In FT, they probably also had access to traded "whisky". No mention of real beers.	Henry 1941: 56-57,69,115,162-163,169-170
SCCS181	Cayua (Guaraní)	Guaraní (SM04)	1890	8	8	NA	8	4	Cayua's indigenous beverage (kaguiai) was prepared mainly with maize (but also with sweet potatoes or manioc). In FT, they could have access to distilled alcohol. The production of fermented drinks (from honey or fruit) in FT is possible but uncertain.	Métraux 1948: 89; Watson 1945: 9,15n22,22; Watson 1952: 28,30,34,67,70,76,88
SCCS182	Lengua	Enxet and Enlhet (SK15)	1889	8	8	8	8	4	Lengua (Enxet and Enlhet) made various intoxicating liquors (from "algaroba bean" [P. juliflora pod], honey, maize, or pumpkins). In the FT, they probably had access to distilled alcohol (rum) but they rarely consumed it.	Grubb 1911: 46,76,101-103,181-182,184,204-205,239-240
SCCS183	Abipón	Abipon (SI04)	1750	8	8	8	2	3	Abipón made fermented drinks from honey or alfaroba [P. juliflora pod?]. No mention of brewed drinks. "Brandy" mentioned but drinking it may have been very rare.	Dobrizhoffer 1822: 52-53,55,106,136,153-154,244,306-308,366-367,413-414,432-439
SCCS184	Mapuche	Aracuanians (SG04)	1950	8	8	8	8	4	Mapuche made fermented beverages from more than a dozen different kinds of grains and seeds, berries and fruits, and tubers. In FT, they also had access to traded distillates.	Cooper 1946: 741,759-760; Faron 1961: 20,42,45,141,175; Hilger 1957: 72-73,214-215,291,301,371,392; Titiev 1951: 10,22,29-30,84-85,143
SCCS185	Tehuelche	Tehuelche (SH05)	1870	4	4	4	3	4	Tehuelche "possess no intoxicants of their own". In FT, however, they had access to traded distilled drinks (and perhaps also wine).	Musters 1872: 199; Musters 1873: 41-42,74,196-197,221-222,245-246,284,289,299; Cooper 1946: 157
SCCS186	Yahgan	Yahgan (SH06)	1865	4	4	4	3	4	"In the entire vegetable kingdom of the Cape Horn region there is not a sufficient amount of a single fruit that would be suitable for the manufacture of alcoholic beverages. The latter were unknown to the Yamana until they were offered to them by Europeans" (Gusinde 1961[1937]: 302). In 1910s (and possibly already in the FT), they had access to traded wine and, rarely, whiskey.	Gusinde 1961[1937]: 132,300-303,309,325,898,1305,1379; Cooper 1946: 83,100
