# Supplementary material for: Did alcohol facilitate the evolution of complex societies?
Source: Research Square preprint supplement (doi:10.21203/rs.3.rs-3685937/v1), 2024-01-17
Supplement: Supplementary file 4 [file ALCOHOL_dataset_references.docx]

**References for ALCOHOL_dataset.xlsx**

## Legend

S1 = Considered a match for the Standard Cross Cultural Sample (SCCS).

S2 = Considered a partial match for the Standard Cross Cultural Sample (SCCS).

S3 = Use as a match for the Standard Cross Cultural Sample (SCCS) with caution.

E1 = Considered a match for the Ethnographic Atlas (EA).

E2 = Considered a partial match for the Ethnographic Atlas (EA).

SCCS = Principal authority according to *Murdock & White (1969). Standard Cross-Cultural Sample. Ethnology 8(4), 329-369*.

## **Nama (SCCS1)**

S1Schultze, L. (1958[1907]). In *Namaland and the Kalahari [Aus Namaland und Kalahari]*. Jena: Gustav Fischer.

SCCSSchapera, I. (1930). *The Khoisan Peoples of South Africa Bushmen and Hottentots*. London: Routledge and Kegan Paul.

## !Kung (SCCS2)

S1Marshall L. (1965). The !Kung Bushmen of the Kalahari Desert. In J. L. Gibbs, Jr. (Ed.), *Peoples of Africa* (pp. 241-278). New York: Holt, Rinehart & Winston.

S1Marshall L. (1976). *The !Kung of Nyae Nyae*. Cambridge MA: Harvard University Press.

## Tsonga (SCCS3)

S1Junod, H. A. (1927a). *The Life of a South African Tribe: Volume 1*. London: Macmillan.

S1Junod, H. A. (1927b). *The Life of a South African Tribe: Volume 2*. London: Macmillan.

## Lozi (SCCS4)

S1Gluckman, M. (1941). *Economy of the Central Barotse Plain*. Livingstone: The Rhodes-Livingstone Institute.

S1Gluckman, M. (1959). The Lozi of Barostseland in North-western Rhodesia. In E. Colson & M. Gluckman (Eds.), *Seven Tribes of British Central Africa* (pp. 1-93). Manchester: Manchester University Press; Rhodes-Livingstone Institute.

## Mbundu (SCCS5)

S2Childs, G. M. (1949). *Umbundu Kinship and Character*. London: Oxford Univ. Press

E1Hambly, W. D. (1934). The Ovimbundu of Angola. *Field Museum Anthropological Series 21(2)*, 89-362.

## Suku (SCCS6)

S2Kopytoff, I. (1964). Family and lineage among the Suku of the Congo. In R. F. Gray & P. H. Gulliver (Eds.), *The Family Estate in Africa* (pp. 83-116). Boston: London: Routledge & Kegan Paul.

S2Kopytoff, I. (1965). The Suku of southwestern Congo. In J. L. Gibbs, Jr. (Ed.), *Peoples of Africa* (pp. 441-478). New York: Holt, Rinehart & Winston.

S2Kopytoff, I. (1990). Women's roles and existential identities. In P. R. Sanday & Goodenough R. G. (Eds.), *Beyond the second sex* (pp. 75-98). Philadelphia: University of Pennsylvania Press.

## Bemba (SCCS7)

S1Richards, A. I. (1939). *Land, Labour and Diet in Northern Rhodesia: An Economic Study of the Bemba Tribe*. London: Oxford University Press.

## Nyakyusa (SCCS8)

S1Wilson, G. (1936). An introduction to Nyakyusa society. *Bantu Studies 10*, 253–291.

S1Wilson, G. (1939). *The Constitution of Ngonde*. Livingstone: The Rhodes-Livingstone Institute.

S1Wilson, M. H. (1957). *Rituals of kinship among the Nyakyusa*. London: Oxford University Press.

S1Wilson, M. H. (1959). *Communal rituals of the Nyakyusa*. London: Oxford University Press.

## Hadza (SCCS9)

S3Bleek, D. F. (1931). The Hadzapi or Watindega of Tanganyika Territory. *Africa 4(3)*, 273-286.

Marlowe, F. (2004). The Hadza. In C. R. Ember & Ember, M. (Eds.), *Encyclopedia of medical anthropology: Cultures (Vol. 2)* (pp. 689-696).

Marlowe, F. (2010). *The Hadza: Hunter-Gatherers of Tanzania*. Berkley: University of California Press

## Luguru (SCCS10)

S1Scheerder, G. & Tastevin, C. F. (1950). Les Wa lu guru. *Anthropos 45*, 241-286.

S1Beidelman, T. O. (1967). Luguru. In *The Matrilineal Peoples of Eastern Tanzania* (pp. 26-34). London: International African Institute.

## Kikuyu (SCCS11)

S1Kenyatta, J. (1953). *Facing Mount Kenya: the tribal life of the Gikuyu*. London: Secker and Warburg.

S1Lambert, H. E. (1956). *Kikuyu social and political institutions*. London: Oxford University Press.

S1Leakey, L. S. B. (1952). *Mau Mau and the Kikuyu*. London: Methuen & Co.

Routledge, W. S & Routledge, K. (1910). *With a prehistoric people, the Akikuyu of British East Africa*. London: Edward Arnold.

## Ganda (SCCS12)

S1Roscoe, J. (1911). *The Baganda: an account of their native customs and beliefs*. London: Macmillan.

Mair, L. P. (1934). *An African People in the Twentieth Century*. London: Routledge & Sons.

## Mbuti (SCCS13)

S1Turnbull, C. M. (1962). *The forest people*. New York: Simon and Schuster.

S1Turnbull, C. M. (1965a). The Mbuti Pygmies: an ethnographic survey. *Anthropological Papers of the American Museum of Natural History 50(3)*, 139-282.

S1Turnbull, C. M. (1965b). *Wayward servants: the two worlds of the African Pygmies*. Garden City: The Natural History Press.

Ichikawa, M. (1981). Ecological and sociological importance of honey to the Mbuti Net Hunters, Easter Zaire. *African Study Monographs 1*, 55-68.

## Nkundo (SCCS14)

S1Hulstaert, G. E. (1959[1938]). *Marriage among the Nkundu [Le mariage des Nkundó]*. Brussels: Falk.
Boelaert, E. (1959[1940]). Nkundo society [De Nkundo-Maatschappij]. *Kongo—Overzee 6*, 148-161.

Nelson, S. H. (1994). *Colonialism in the Congo basin, 1880-1940*. Ohio: Ohio University Center for International Studies.

## Banen (SCCS15)

S1Dugast, I. (1954). The Banen. In D. Forde (Ed.), *Peoples of the central Cameroons* (pp. 134-153). London: International African Institute.

S1Dugast, I. (1955). *Monographie de la Tribu des Ndiki (Banen du Cameroun): Tome 1 -- Vie matérielle*. Paris: Institut d'ethnologie.

## Tiv (SCCS16)

S1Abraham, R. C. (1933). *The Tiv people*. Lagos: The Government Printer.

S1Akiga (1939). *Akiga's story: the Tiv tribe as seen by one of its members*. London: Oxford University Press.

S1Bohannan, P. & Bohannan, L. (1968). *Tiv economy*. Evanston: Northwestern University Press.

Bohannan, P. & Bohannan, L. (1958). *Three source notebooks in Tiv ethnography*. New Haven: Human Relations Area Files.

## Igbo (SCCS17)

S1Green, M. M. (1964). *Ibo village affairs*. New York: Praeger.

S2Uchendu, V. C. (1965). *The Igbo of southeast Nigeria*. New York: Rinehart and Winston.

E1Meek, C. K. (1970). *Law and authority in a Nigerian tribe: a study in indirect rule*. New York: Barnes & Noble.

E2Basden, G. T. (1966). *Niger Ibos: a description of the primitive life, customs and animistic beliefs, etc., of the Ibo people of Nigeria*. London: Frank Cass.

## Fon (SCCS18)

S1Herskovits, M. J. (1933). *An outline of Dahomean religious belief*. Menasha: The American Anthropological Association.

S1Herskovits, M. J. (1967). *Dahomey, an ancient West African kingdom: volume 1*. Evanston: Northwestern University Press.

S1Le Herissé, A. (1911). *L'Ancien Royaume du Dahomey*. Paris: Émile LaRose.

Manning, P. (1980). The technology of production in southern Dahomey, c. 1900. *African Economic History 9*, 49-67.

## Ashanti (SCCS19)

S1Rattray, R. S. (1923). *Ashanti*. Oxford: Clarendon Press.

S1Rattray, R. S. (1927). *Religion and art in Ashanti*. Oxford: Clarendon Press.

S1Rattray, R. S. (1929). *Ashanti law and constitution*. Oxford: Clarendon Press.

Warren, D. M. (1975). *The Techiman-Bono of Ghana: an ethnography of an Akan society*. Dubuque: Kendall/Hunt Pub. Co.

McLeod, M. D. (1981). *The Asante*. London: British Museum Publications.

Dumett, R. E. (1974). The Social Impact of the European Liquor Trade on the Akan of Ghana (Gold Coast and Asante), 1875-1910. *The Journal of Interdisciplinary History 5(1)*, 69-101.

## Mende (SCCS20)

S1Little, K. L. (1951). *The Mende of Sierra Leone*. London: Routledge and Kegan Paul.

E1Staub, J. (1958[1936]). *Contributions to a knowledge of the material culture of the Mende in Sierra Leone [Beiträge zur Kenntnis der materiellen Kultur der Mendi in der Sierra Leone]*. Solothurn: Vogt-Schild.

## Wolof (SCCS21)

S1Gamble, D. P. (1957). *The Wolof of Senegambia: together with notes on the Lebu and the Serer*. London: International African Institute.

Ndao, P. A. (2008). Alcool et nomination dans l'espace interculturel sénégalais. *Sudlangues 9*, 18-45.

## Bambara (SCCS22)

S1Henry, J. (1960[1910]). *The Soul of an African people [L'ame d'un peuple Africain]*. Munster: Aschendorff.

S1Monteil, C. (1960[1924]). *The Bambara of Ségou and Kaarta [Les Bambara du Ségou et du Kaarta]*. Paris: Émile LaRose.

Paques, V. (1959[1954]). *The Bambara [Les Bambara]*. Paris: Presses universitaires de France.

## Tallensi (SCCS23)

S1Fortes, M. & Fortes, S. L. (1936). Food in the domestic economy of the Tallensi. *Africa 9*, 237-276.

S1Fortes, M. (1945). *The dynamics of clanship among the Tallensi: being the first part of an analysis of the social structure of a Trans-Volta tribe*. London: International African Institute.

S1Fortes, M. (1949). *The web of kinship among the Tallensi: the second part of an analysis of the social structure of a Trans-Volta tribe*. London: International African Institute.

## Songhai (SCCS24)

S1Rouch, J. (1954). *Les Songhay*. Paris: Presses universitaires de France.

S1Rouch, J. (1960). *La religion et la magie Songhay*. Paris: Presses universitaires de France.

Miner, H. M. (1953). *The primitive city of Timbuctoo*. Princeton: Princeton University Press

## Wodaabe Fulani (SCCS25)

S1Dupire, M. (1962). *Peuls nomades: étude descriptive des WoDaaBe du sahel nigérien*. Paris: Institut d'ethnologie.

S1Dupire, M. (1963). The position of women in a pastoral society. In D. Paulme (Ed.), *Women of Tropical Africa* (pp. 47-92). Berkeley: University of California Press.

Stenning, D. J. (1959). *Savannah Nomads: a study of the Wodaabe pastoral Fulani of Western Bornu Province, Northern Region, Nigeria*. London: International African Institute.

## Zazzagawa Hausa (SCCS26)

S1Smith, M. G. (1955). *The economy of Hausa communities of Zaria*. H. London: H.M. Stationery Office.

S1Smith, M. G. (1965). The Hausa of northern Nigeria. In J. L. Gibbs Jr. (Ed.), *Peoples of Africa*, (pp. 119-155). New York: Holt, Rinehart & Winston.

Hill, P. (1972). *Rural Hausa: a village and setting*. Cambridge: Cambridge University Press.

## Masa (SCCS27)

SCCSvon Hagen, G. (1912). Die Bana. *Baessler-Archiv 2*, 77-116.

S3de Garine, I. (1964). *Les Massa du Cameroun: vie économique et sociale*. Paris: Presses universitaires de France.

## Azande (SCCS28)

S1Baxter, P. T. W. & Butt, A. (1953). *The Azande, and related peoples of the Anglo-Egyptian Sudan and Belgian Congo*. London: International African Institute.

S1Evans-Pritchard, E. E. (1971). *The Azande: history and political institutions*. Oxford: Clarendon Press.

Czekanowski, J. (1924). *Research in the Nile-Congo Region [Forschungen im Nil-Kongo Zwischengebiet]*. Leipzig: Klinkhardt und Biermann.

## Fur (SCCS29)

S1Felkin, R. W. (1886). Notes on the For Tribe of Central Africa. *Proceedings of the Royal Society of Edinburgh 13*, 205-265.

S2Beaton, A. C. (1948). The Fur. *Sudan Notes and Records 29*, 1-39.

## Otoro (SCCS30)

S2Nadel, S. F. (1947). *The Nuba: an anthropological study of the hill tribes in Kordofan*. London: Oxford University Press.

## Shilluk (SCCS31)

S1Seligman, C. G. & Seligman, B. Z. (1932). *Pagan tribes of the Nilotic Sudan*. London: George Routledge & Sons, Ltd.

Westermann, D. (1912). *The Shilluk people, their language and folklore*. Philadelphia: The Board of Foreign Missions of the United Presbyterian Church of North America.

## Mao (SCCS32)

S1Grottanelli, V. L. (1940). *Mao*. Rome: Reale Accademia d'Italia.

S2Cerulli, E. (1956). *Peoples of south-west Ethiopia and its borderland*. London: International African Institute.

## Kafa (SCCS33)

SCCSBieber, F. J. (1920). *Kaffa: Ein Altkuschitisches Volkstum in Inner-Afrika. Band 2*. Munster: Aschendorff.

S3Huntingford, G. W. B. (1955). *The Galla of Ethiopia: the Kingdoms of Kafa and Janjero*. London: International African Institute.

## Maasi (SCCS34)

S1Hollis, A. C. (1905). *The Masai: Their Language and Folklore*. Oxford: Clarendon Press.

S1Merker, M. (1971[1910]). *The Masai: ethnographic monograph of an East African Semite people [Die Masai: Etnographische Monographie eines Ostafrikanischen Semitenvolkes]*. Berlin: Dietrich Reimer.

## Konso (SCCS35)

S1Hallpike, C. R. (1970). Konso agriculture. *Journal of Ethiopian studies 8(1)*, 31-43.

S1Hallpike, C. R. (2008). *The Konso of Ethiopia: A study of the values of an east Cushitic people*. Central Milton Keynes: AuthorHouse.

## Somali (SCCS36)

S1Lewis, I. M. (1961). *A pastoral democracy: a study of pastoralism and politics among the northern Somali of the Horn of Africa*. London: International African Institute.

S2Lewis, I. M. (1955). *Peoples of the Horn of Africa: Somali, Afar, and Saho*. London: International African Institute.

E1Puccioni, N. (1960[1936]). *Anthropology and Ethnography of the Peoples of Somalia [Antropologia e Etnografia delle genti della Somalia]*. Bologna: Nicola Zanichelli.

## Amhara (SCCS37)

S1Messing, S. D. (1985). *Highland plateau Amhara of Ethiopia*. New Haven: Human Relations Area Files.

## Blin (SCCS38)

S1Munzinger, W. (2019[1859]). *About the customs and laws of the Bogos [Ueber die sitten und das recht der Bogos]*. Winterthur: J. Wurster & comp.

## Barabra (SCCS39)

S1Herzog, R. (1957). *Die Nubier: Untersuchungen und Beobachtungen zur Gruppengliederung, Gesellschaftsform und Wirtschaftsweise*. Berlin: Akademie-Verlag.

## Teda (SCCS40)

S1Chapelle, J. (1982[1957]). *Black nomads of the Sahara [Nomades noires du Sahara]*. Paris: Librairie Plon.

S1Kronenberg, A. (1981[1958]). *The Teda of Tibesti [Die Teda von Tibesti]*. Horn-Wien: Verlag Ferdinand Berger.

S1Le Coeur, C. (1981[1950]). *Teda ethnographic dictionary preceded by a French-Teda lexicon [Dictionnaire ethnographique téda précédé d'un lexique français-téda]*. Paris: Librairie Larose.

E1Cline, W. B. (1950). *The Teda of Tibesti, Borku, and Kawar in the eastern Sahara*. Menasha: George Banta.

## Tuareg Ahaggar (SCCS41)

S1Benhazera, M. (1960[1908]). *Six months among the Ahaggar Tuareg [Six mois chez les Touareg du Ahaggar]*. Algiers: Typographie Adolphe Jourdan.

SCCSLhote, H. (1956[1944]). *The Hoggar Tuareg [Les Touaregs du Hoggar]*. Paris: Payot.

## Riffians (SCCS42)

S1Coon, C. S. (1931). *Tribes of the Rif*. Cambridge, Mass.: Peabody Museum of Harvard University.

McNeill, J. R. (2003). *The Mountains of the Mediterranean World*. Cambridge: Cambridge University Press.

## Egyptians (SCCS43)

S1Ammar, H. (1954). *Growing up in an Egyptian village: Silwa, Province of Aswan*. London: Routledge and Kegan Paul Ltd.

Ayrout, H. H. (1945). *The Fellaheen*. Cairo: R. Schindler.

Rios, L. (2016). Drinking Alcohol Is Always an Open Secret in Egypt. *Vice*, 19 August 2016. Accessed 30 June 2023, https://www.vice.com/en/article/4xbbqj/drinking-alcohol-is-always-an-open-secret-in-egypt.

## Hebrews (SCCS44)

S1Faust, A. & Weis, E. (2005). Judah, Philistia, and the Mediterranean world. *Bulletin of the American Schools of Oriental Research 388*, 71-92.

S2Heaton, E. W. (1956). *Everyday life in Old Testament times*. New York: Scribner.

S3Borowski, O. (2003). *Daily life in biblical times*. Leiden: Brill.

## Babylonians (SCCS45)

S2Leick, G. (2003). *The Babylonians: an introduction*. London: Routledge.

S2Saggs, H. W. F. (1988). *The greatness that was Babylon: a survey of the ancient civilization of the Tigris-Euphrates Valley*. London: Sidgwick and Jackson.

## Rwala (SCCS46)

S1Raswan, C. R. (1947). *Black tents of Arabia*. New York: Creative Age Press.

Musil, A. (1928). *The manners and customs of the Rwala Bedouins*. New York: The American Geographical Society.

Lancaster, W. (1981). *The Rwala bedouin today*. Cambridge: Cambridge University Press.

## Turks (SCCS47)

S1Makal, M. (1954). *A village in Anatolia*. London: Vallentine, Mitchell and Co. Ltd.

S1Pierce, J. E. (1964). *Life in a Turkish village*. New York: Holt, Rinehart and Winston.

SCCSStirling, P. (1965). *Turkish Village*. London: Weidenfeld and Nicolson.

Evered, E. Ö., & Evered, K. T. (2016). From rakı to ayran: Regulating the place and practice of drinking in Turkey. *Space and Polity 20*(1), 39-58.

Michalak, L., & Trocki, K. (2006). Alcohol and Islam: an overview. *Contemporary drug problems 33*(4), 523-562.

## Gheg (SCCS48)

SCCSCoon C. S. (1950). *The Mountain of Giants: A Racial and Cultural Study of the North Albanian Mountain Ghegs*. Cambridge: Peabody Museum.

S1Durham, M. E. (1910). High Albania and its customs in 1908. *Journal of the Royal Anthropological institute of Great Britain & Ireland 40*, 453-472.

S1Durham, M. E. (1928). *Some tribal origins, laws, and customs of the Balkans*. London: George Allen and Unwin.

S1Hasluck, M. (1954). *The unwritten law in Albania*. Cambridge: Cambridge University Press.

## Ancient Romans (SCCS49)

S1Carcopino, J. (1940). *Daily life in ancient Rome: the people and the city at the height of the empire*. New Haven: Yale University Press.

S1Loane, H. J. (1938). *Industry and commerce of the city of Rome (50 B.C.-200 A.D.)*. Baltimore: Johns Hopkins Press.

S1Rivenburg, M. J. (1939). *Fashionable life in Rome as portrayed by Seneca*. Philadelphia: University of Pennsylvania.

Pliny the Elder. *The Natural History (Naturalis historia).*

## Spanish Basques (SCCS50)

S3Caro Baroja, J. (1958). *Los Vascos*. Madrid: Ediciones Minotauro.

Collins, R. (1987). *The Basques*. Oxford: Basil Blackwell.

Douglass, W. A. (1975). *Echalar and Murelaga: opportunity and rural exodus in two Spanish Basque villages*. New York: St. Martin's Press.

Sevilla, M. J. (1990). Life and food in the Basque country. Lanham: New Amsterdam.

## Irish (SCCS51)

S1Arensberg, C. M. & Kimball, S. T. (1940). *Family and Community in Ireland*. Cambridge: Harvard University Press.

Evans, E. E. (1957). *Irish folk ways*. London: Routledge and Kegan Paul.

Meussdoerffer, F. G. (2009). A comprehensive history of beer brewing. In H. B. Hans Michael Eßlinger (Ed.) *Handbook of brewing: Processes, technology, markets* (pp. 1-42). Weinheim: Wiley.

## Sami (SCCS52)

S1Pehrson, R. N . (1957). *The bilateral network of social relations in Könkämä Lapp district*. Bloomington: Indiana University.

Anderson, M. (1978). *Saami ethnoecology: resource management in Norwegian Lapland*. Ph.D. Thesis. Yale University.

Collinder, B (1949). *The Lapps*. Princeton: American Scandinavian Foundation

Ingold, T. (1976). *The Skolt Lapps today*. London: Cambridge University Press.

Itkonen, T. I. (1962[1948]). *The Lapps in Finland up to 1945. Vol. 1 [Suomen Lappalaiset vuoteen 1945]*. Porvoo, Helsinki: Werner Söderström Osakeyhtiö.

Itkonen, T. I. (1972[1948]. *The Lapps in Finland up to 1945. Vol. 2 [Suomen lappalaiset vuoteen 1945]*. Porvoo, Helsinki: Werner Söderström Osakeyhtiö.

Pelto, P. J. (1962). *Individualism in Skolt Lapp society*. Helsinki: Suomen Muinaismuistoyhdistys.

## Yurak-Samoyeds (SCCS53)

S1Engelhardt, A. P. (1899). *A Russian province of the north*. Westminster: Archibald Constable and Company.

S1Islavin, V. (1953[1847]). *The Samoyed in their domestic and social life [Samoiedy v domashnem i obschestvennom bytu]*. Sanktpeterburg: Ministerstva Gosudarstvennykh Imushchest.

SCCSJackson, F. G. (1895). *The Great Frozen Land*. New York: Macmillan.

## Russians (SCCS54)

S1Benet, S. (ed.) 1970. *The village of Viriatino: an ethnographic study of a Russian village from before the revolution to the present*. Garden City, N.Y.: Anchor Books.

S1Krupianskaia, V. U. (1970). Family Structure and Family Life. In S. Benet (Ed.), *The village of Viriatino* (pp. 91-129). Garden City, N.Y.: Anchor Books.

S2Dunn, S. P. & Dunn, E. (1988). *The peasants of central Russia*. Prospect Heights, Ill.: Waveland Press.

## Abkhaz (SCCS55)

S1Janašvili, M. (1963[1894]). *Abkhazia and the Abkhaz [Abkhaziya i abkhaztsy]*. Tiflis.

Benet, S. (1974). *Abkhasians: the long-living people of the Caucasus*. New York: Holt, Rinehart and Winston.

Garb, P. (1984). *From childhood to centenarian*. Moscow: Progress Publishers.

## Armenians (SCCS56)

S1Haxthausen, A. von (1854*). Transcaucasia: sketches of the nations and races between the Black Sea and the Caspian*. London: Chapman and Hall.

Villa, S. H. & Matossian, M. K. (1982). *Armenian village life before 1914*. Detroit: Wayne State University Press.

## Kurd (SCCS57)

S1Masters, W. M. (1953). *Rowanduz: a Kurdish administrative and mercantile center*. Ph.D. Thesis. University of Michigan.

## Basseri (SCCS58)

S1Barth, F. (1961). *Nomads of South-Persia: the Basseri tribe of the Khamseh Confederacy*. Boston: Little, Brown and Company.

## Punjabi (SCCS59)

S1Eglar, Z. S. (1960). *A Punjabi village in Pakistan*. New York: Columbia University Press.

S3Honigmann, J. J. (1958). Third village: Punjab Province, Chak. In *Three Pakistan villages* (pp. 68-95). Chapel Hill: Institute for Research in Social Science, University of North Carolina.

S3Kennedy, M. J. (1957). Panjabi urban society. In S. Maron (Ed.) *Pakistan: society and culture* (pp. 81-103). New Haven: HRAF.

Symonds, R. (1950). *The Making of Pakistan*. London: Faber & Faber.

## Madia (SCCS60)

S1Grigson, W. V. (1949). *The Maria Gonds of Bastar*. London: Oxford University Press.

S1Elwin, V (1947). *The Muria and their ghotul*. Bombay: Oxford University Press.

## Toda (SCCS61)

*S1*Rivers, W. H. R. (1906). *The Todas*. London: Macmillan.

Marshall, W.E. (1873). *A phrenologist amongst the Todas*. London: Longmans, Green.

## Santal (SCCS62)

S1Biswas, P. C. (1956). *Santals of the Santal Parganas*. Delhi: Bharatiya Adimjati Sevak Sangh.

S1Culshaw, W. J. (1949). *Tribal heritage: a study of the Santals*. London: Lutterworth Press.

S1Mukherjea, C. (1962). *The Santals*. Calcutta: A. Mukherjee & Co., Private Ltd.

## Uttar Pradesh (SCCS63)

S1Opler, M. E. & Singh, R. D. (1954). The division of labor in an Indian village. In C. S. Coon (Ed.), *A Reader in General Anthropology* (pp. 464-496). New York: Henry Holt.

Opler, M. E. & Singh, R. D. (1952). Economic, political and social change in a village of north central India. *Human organization: journal of the Society for Applied Anthropology 11(2)*, 5-12.

## Burusho (SCCS64)

S1Lorimer, E. O. (1938). The Burusho of Hunza. *Antiquity 12(45)*, 5-15.

S1Lorimer, E. O. (1939). *Language hunting in the Karakoram*. London: Allen and Unwin.

## Kazakh (SCCS65)

S1Grodekov, N. I. (1959[1889]). *The Kazakhs and Kirgiz of the Syr-Darya Oblast [Kirghizy i Karakirgizy sur Dar'inskoi Oblasti]*. Tashkent: The Typolithography of S. I. Lakhtin.

S1Hudson, A. E. (1938). *Kazak social structure*. New Haven: Yale University Press.

## Khalka (SCCS66)

S1Vreeland, H. H. (1954). *Mongol Community and Kinship Structure*. Westport: Greenwood Press.

Maiskii, I. M. (1956[1921]). *Contemporary Mongolia [Sovremennaia Mongoliia]*. Irkutsk: Gosudarstvennoe Izdatel'stvo, Irkutskoe Otdelenie.

Montell, G. (1937). Distilling in Mongolia. *Ethnos 2(5)*, 321-332.

## Lolo (SCCS67)

S1Lin, Y. (1960[1947]). *The Lolo of Liang-shan [Liang-shan I-chia]*. Shanghai: The Commercial Press.

S1Tseng, C. (1956[1945]). The Lolo district in Liang-Shan [Liang-Shan I-Chü Kai-Huang]. In *Ta Liang-shan I-ch'ü k'ao - ch'a-chi* (pp. 91-139). Chungking.

SCCSD'Ollone, H. M. (1912). *In Forbidden China*. Boston: Small Maynard and Company.

## Lepcha (SCCS68)

S1Gorer, G. (1938). *Himalayan Village: an account of the Lepchas of Sikkim*. London: Michael Joseph, Ltd.

S1Morris, J. (1938). *Living with Lepchas: a book about the Sikkim Himalayas*. London: William Heinemann Ltd.

## Garo (SCCS69)

S1Burling, R. (1963). *Rengsanggri: family and kinship in a Garo village*. Philadelphia: University of Pennsylvania Press.

S1Playfair, A. (1909). *The Garos*. London: David Nutt.

## Maras (SCCS70)

S1Parry, N. E. (1932). *The Lakhers*. London: Macmillan.

## Burmese (SCCS71)

S1Nash, M. (1965). *The Golden Road to Modernity: Village Life in Contemporary Burma*. New York: Wiley.

S3Scott, J. G. [Shway, Y.] (1910). *The Burman: his life and notions*. London: Macmillan.

Ferrars, M. & Ferrars, B. (1901). *Burma*. London: Sampson Low, Marston and Company.

Lieberman, V. (2003). *Strange Parallels: Southeast Asia in Global Context, c.800–1830. Volume 1: Integration on the Mainland.* Cambridge: Cambridge University Press.

## Lamet (SCCS72)

S1Izikowitz, K. G. (1951). *Lamet: hill peasants in French Indochina*. Göteborg: Elanders.

## Annamese (SCCS73)

S1Gourou, P. (1953[1936]). *Peasants of Tonkin Delta: a Study of Human Geography [Les paysans du delta tonkinois: étude de géograpie humaine]*. Paris: Les éditions d'Art et d'Histoire.

Thanh, V. N., & Viet Anh, N. T. (2016). Ethnic fermented foods and beverages of Vietnam. In J. P. Tamang (Ed.), *Ethnic fermented foods and alcoholic beverages of Asia* (pp. 383-409). Springer.

## Rade (SCCS74)

S1Donoghue, J. D., Whitney, D. D. & Ishino, I. (1962). *People in the Middle: The Rhade of South Vietnam*. East Lansing: Michigan State University.

Hickey, G. C. (1993). Rhadé. In *Shattered World: Adaptation and Survival among Vietnam's Highland Peoples during the Vietnam War* (pp. 1-46). Philadelphia: University of Pennsylvania Press.

Thanh, V. N., & Viet Anh, N. T. (2016). Ethnic fermented foods and beverages of Vietnam. In J. P. Tamang (Ed.), *Ethnic fermented foods and alcoholic beverages of Asia* (pp. 383-409). Springer.

## Ancient Khmer (SCCS75)

S1Zhou, Daguan (1902). Mémoires sur les coutumes du Cambodge. *Bulletin de l'Ecole française d'Extrême-Orient 2*, 123-177.

## Thai (SCCS76)

S1Goldsen, R. K. & Ralis, M. (1957). *Factors related to acceptance of innovations in Bang Chan, Thailand*. Ithaca: Cornell University.

S1Phillips, H. P. (1966). *Thai peasant personality: the patterning of interpersonal behavior in the village of Bang Chan*. Berkeley: University of California Press.

S1Sharp, L. & Hanks, L. M. (1978). *Bang Chan: social history of a rural community in Thai*. Ithaca: Cornell University Press.

Kaufman, H. K. (1960). *Bangkhuad: a community study in Thailand*. Locust Valley: Association for Asian Studies.

Thamarangsi, T. (2006), Thailand: alcohol today. *Addiction 10*, 783-787.

## Semang (SCCS77)

S1Schebesta, P. (1962[1954]). *The Negritos of Asia; vol. 2, ethnography of the Negritos: half-vol. 1, economy and sociology [Die Negrito Asiens; II. Band, Ethnographie der Negrito]*. Wien-Mödling: St. -Gabriel-Verlag.

## Nicobarese (SCCS78)

S1Man, E. H. (1932). *The Nicobar Islands and their people*. Guildford: The Royal Anthropological Institute of Great Britain and Ireland.

S3Whitehead, G. (1924). *In the Nicobar Islands*. London: Seeley, Service & Co.

## Andamanese (SCCS79)

S2Man, E. H. (1932). *On the Aboriginal Inhabitants of the Andaman Islands*. London: The Royal Anthropological Institute of Great Britain and Ireland.

S2Radcliffe-Brown, A. R. (1922). *The Andaman Islanders: a study in social anthropology*. Cambridge: Cambridge University Press.

## Vedda (SCCS80)

S1Bailey, J. (1863). An Account of the Wild Tribes of the Veddahs of Ceylon. *Transactions of the Ethnological Society of London 2*, 278-320.

S1Seligman, C. G. & Seligman, B. Z. (1911). *The Veddas*. Cambridge: Cambridge University Press.

## Tanala (SCCS81)

S1Linton, R. (1933). *The Tanala. A Hill Tribe of Madagascar*. Chicago: Field Museum of Natural History.

## Negri Sembilan (SCCS82)

S1Gulick, J. M. (1958). *Indigenous Political Systems of Western Malaya*. London: University of London.

E1Firth, R. (1943). *Housekeeping among Malay peasants*. London: London School of Economics and Political Science.

Jernigan, D. H. & Indran, S. (1999). Country profile on alcohol in Malaysia. In L. Riley & M. Marshall (Eds.) *Alcohol and Public Health in 8 Developing Countries* (pp. 61-73). Geneva: WHO.

## Javanese (SCCS83)

S1Geertz, C. (1960). *The religion of Java*. London: Free Press of Glencoe.

S1Geertz, C. (1975). *The social history of an Indonesian town*. Westport: Greenwood Press.

S1Jay, R. (1969). *Javanese villagers: social relations in rural Modjokuto*. Cambridge: MIT Press.

Koentjaraningrat (1976). *Javanese*. New Haven: HRAF.

Jákl, J. (2021). *Alcohol in Early Java: Its Social and Cultural Significance*. Leiden: Brill.

## Balinese (SCCS84)

S1Belo, J. (1936). The Balinese temper, character and personality. *Character and personality: International psychological quarterly 4*, 120-146.

Belo, J. (1953). *Bali: temple festival*. Locust Valley: J. J. Augustin.

Covarrubias, M (1938). *Island of Bali*. New York: Alfred A. Knopf.

Geertz, C. (1963). Economic development in Tabanan. In *Peddlers and princes: social change and economic modernization in two Indonesian towns* (pp. 82-141). Chicago: University of Chicago Press.

## Iban (SCCS85)

S1Freeman, D. (1955). *Iban agriculture: a report on the shifting cultivation of hill rice by the Iban of Sarawak*. London: Her Majesty's Stationery Office.

Gomes, E. H. (1911). *Seventeen years among the Sea Dyaks of Borneo*. London: Seeley & Co.

Haddon, A. C. & Start, L. E. (1936). *Iban Sea Dayak fabrics and their patterns: a descriptive catalogue of the Iban fabrics in the Museum of Archaeology and Ethnology, Cambridge*. Cambridge: Cambridge University Press.

Kedit, P. M. (1991). Meanwhile, back home… BEJALAI and its effects on Iban men and women. In V. H. Sutlive, Jr. (Ed.) *Female and male in Borneo: contributions and challenges to gender studies* (pp. 295-316). Williamsburg: The Borneo Research Council.

Sandin, B. (1980). *Iban adat and augury*. George Town, Penang: Penerbit Universiti Sains Malaysia for School of Comparative Social Sciences.

## Badjau Tawi-Tawi (SCCS86)

S1Nimmo, H. A. (1972). *The sea people of Sulu: a study of social change in the Philippines*. San Francisco: Chandler.

S2Nimmo, H. A. (2000). *Magosaha: an ethnology of the Tawi-Tawi Sama Dilaut*. Quezon City: Ateneo de Manila University Press.

Teo, S. S. (1989). *The lifestyle of the Badjaos: a study of education and culture*. Manila: Centro Escolar University Research and Development Center.

## Toradja (SCCS87)

S1Adriani, N. & Kruijt, A. C. (1951[1912]). *The Bare'e-speaking Toradja of central Celebes (the East Toradja): third volume [De Bare'e sprekende Toradjas van Midden-Celebes (de Oost-Toradjas)]*. Batavia: Landesdrukkerij.

## Tobelorese (SCCS88)

S1Hueting, A. (1921). De Tobeloreezen in hun denken en doen: part 1. *Bijdragen tot de Taal- Land- en Volkenkunde van Nederlandsch Indië 77(2),* 217-357.

S1Hueting, A. (1922). De Tobeloreezen in hun denken en doen: part 2. *Bijdragen tot de Taal- Land- en Volkenkunde van Nederlandsch Indië 78(1/2)*, 137-342.

## Alorese (SCCS89)

S1Du Bois, C. A. (1944). *The people of Alor: a social-psychological study of an East Indian Island*. Minneapolis: University of Minnesota Press.

## Tiwi (SCCS90)

S2Hart, C. W. M. & Pilling, A. R. (1960). *The Tiwi of North Australia*. New York: Henry Holt and Company.

Goodale, J. C. (1971). *Tiwi wives: a study of the women of Melville Island, North Australia*. Seattle: University of Washington Press.

Basedow, H. (1913). Notes on the natives of Bathurst Island, North Australia. *The Journal of the Royal Anthropological Institute of Great Britain and Ireland 43*, 291-321.

Brady, M. (2014). Alcohol Fermentation in Australian Aboriginals. In H. Selin (Ed.), *Encyclopaedia of the History of Science, Technology, and Medicine in Non-Western Cultures*. Springer, Dordrecht.

## Northern Aranda (SCCS91)

S1Spencer, B., & Gillen, F. J. (1927). *The Aruntas: A Study of Stone Age People*. London: Macmillan.

Basedow, H (1925). *The Australian aboriginal*. Adelaide: F. W. Preece and sons.

Murdock, G. P. (1934). The Aranda of central Australia. In *Our primitive contemporaries* (pp. 20-48). New York: Macmillan.

Radford, R. (1992). Aspects of the social history of Hermannsburg. In J. Hardy, J. V. S. Megaw, & M. R. Megaw (Eds.), *The Heritage of Namatjira: the watercolourists of central Australia* (pp. 63-96). Victoria: William Heineman Australia.

Brady, M. (2014). Alcohol Fermentation in Australian Aboriginals. In H. Selin (Ed.) *Encyclopaedia of the History of Science, Technology, and Medicine in Non-Western Cultures*. Springer, Dordrecht.

## Orokaiva (SCCS92)

S1Williams, F. E. (1930). *Orokaiva Society*. London: Oxford University Press.

Marshall, M. (1980). *A history of prohibition and liquor legislation in Papua New Guinea, 1884-1963*. Boroko, PNG: Institute of Applied Social and Economic Research.

Schwimmer, E. (1982). Betelnut: The beer of the Orokaiva. In M. Marshall (Ed.), *Through a Glass Darkly: Beer and Modernization in Papua New Guinea* (pp. 319-323). Boroko, PNG: Institute of Applied Social and Economic Research.

## Kimam (SCCS93)

S1Serpenti, L. M. (1965). *Cultivators in the swamp: social structure and horticulture in a New Guinea society*. Assen: Van Gorcum.

## Mee (SCCS94)

S1Pospisil, L. J. (1963). *Kapauku Papuan economy*. New Haven: Dept. of Anthropology, Yale University.

## Kwoma (SCCS95)

S1Whiting, J. W. M. (1941). *Becoming a Kwoma: teaching and learning in a New Guinea tribe*. New Haven: Human Relations.

S1Whiting, J. W. M. (1970). *Kwoma journal*. New Haven: Human Relations Area Files.

SCCSWhiting, J. W. M. & Reed, S. W. (1938). Kwoma Culture: Report on Field Work in the Mandated Territory of New Guinea. *Oceania 9(2)*, 170–216.

## Manus (SCCS96)

S1Mead, M. (1930). *Growing up in New Guinea: a comparative study of primitive education*. New York: Morrow.

S1Mead, M. (1934). Kinship in the Admiralty Islands. *Anthropological Papers of the American Museum of Natural History 34(2)*, 180-358.

S1Mead, M. (1937). The Manus of the Admiralty Islands. In M. Mead (Ed.), *Cooperation and competition among primitive peoples* (pp. 210-239). New York: McGraw-Hill Book Company.

S2Mead, M. (1956). *New lives for old: cultural transformation - Manus, 1928-1953*. New York: Morrow.

Schwartz, T. & Romanucci-Ross, L. (1974). Drinking and inebriate behavior in the Admiralty Islands, Melanesia. *Ethos 2*(3), 213-231.

## Lesu (SCCS97)

S1Powdermaker, H. (1931). Vital statistics of New Ireland (Bismarck Archipelago) as revealed in genealogies. *Human biology 3*, 351-375.

S1Powdermaker, H. (1933). *Life in Lesu: the study of a Melanesian Society in New Ireland*. New York: W. W. Norton & Company.

## Trobriands (SCCS98)

S1Malinowski, B. (1922). *Argonauts of the western Pacific: an account of native enterprise and adventure in the archipelagoes of Melanesian New Guinea*. London: George Routledge & Sons.

S1Malinowski, B. (1929). *The sexual life of savages in northwestern Melanesia: Vol. 1 and 2*. New York: Horace Liveright.

S1Malinowski, B. (1935). *Coral gardens and their magic*. New York: American Book Company.

S1Silas, E. (1926). *A primitive Arcadia*. London: T. Fisher Unwin Ltd.

## Siuai (SCCS99)

S1Oliver, D. L. (1955). *A Solomon Island society: kinship and leadership among the Siuai of Bougainville*. Cambridge: Harvard University Press.

## Tikopia (SCCS100)

S1Firth, R. (1936). *We, the Tikopia: a sociological study of kinship in primitive Polynesia*. London: Allen and Unwin.

S1Firth, R. (1970). *Rank and religion in Tikopia: a study in paganism and conversion to Christianity*. London: Allen and Unwin.

## Bunlap (SCCS101)

S1Lane, R. B. & Lane B. S. (1957). *Unpublished field notes*. eHRAF.

Muller, K. (1975). Agriculture and food preparation in Bunlap (New Hebrides). *Journal de la Société des Oceanistes 31(47)*, 213-221.

## Mbau Fijians (SCCS102)

S2Waterhouse, J. (1866). *The king and people of Fiji*. London: Wesleyan conference office.

Walter, M. A. H. B. (1982). Drink and be merry for tomorrow we preach: alcohol and the male menopause in Fiji. In M. Marshall (Ed.), *Through a Glass Darkly: Beer and Modernization in Papua New Guinea* (pp. 433-436). Boroko, PNG: Institute of Applied Social and Economic Research.

## Ajie (SCCS103)

Connell, J. (1987). *New Caledonia or Kanaky? The political history of a French colony*. Canberra: National Centre for Development Studies, Australian National University.

## Māori (SCCS104)

S1Best, E. (1924). *The Maori: volume 1*. Wellington: H.H. Tombs.

S1Buck, P. H. (1952). *The coming of the Maori*. Wellington: Maori Purposes Fund Board.

S1Firth, R. (1959). *Economics of the New Zealand Maori*. Wellington: R. E. Owen.

S1Hawthorn, H. B. (1944). *The Maori: a study in acculturation*. Menasha: American Anthropological Association.

SCCSEarle, A. (1832). *A Narrative of Nine Months' Residence in New Zealand in 1827*. London: Longman.

## Marquesans (SCCS105)

S2Handy, E. S. C. (1923). *The native culture in the Marquesas*. Honolulu: Bishop Museum.

E1Linton, R. (1939). Marquesan culture. In A. Kardiner (Ed.), *The individual and his society: the psychodynamics of primitive social organization* (pp. 138-196). New York: Columbia University Press.

## Upolu Samoans (SCCS106)

S1Turner, G. (1884). *Samoa, a hundred years ago and long before: together with notes on the cults and customs of twenty-three other islands in the Pacific*. London: Macmillan.

E1Buck, P. H. (1930). *Samoan material culture*. Honolulu: The Museum.

Keesing, F. M. (1934). *Modern Samoa: its government and changing life*. London: Allen & Unwin.

## Makin (SCCS107)

S2Lambert, B. (1966). The economic activities of a Gilbertese chief. In M. J. Swartz, V. W. Turner & A. Tuden (Eds.), *Political anthropology* (pp. 155-172). Chicago: Aldine.

Lambert, B. (2018). *Culture summary: Kiribati*. New Haven: Human Relations Area Files.

Grimble, A. F. (1989). *Tungaru traditions: writings on the atoll culture of the Gilbert Islands*. Honolulu: University of Hawaii Press.

Koch, G. (1986). *The material culture of Kiribati*. Suva: Institute of Pacific Studies of the University of the South Pacific.

Maude, H. E. & Leeson, I. (1965). The coconut oil trade of the Gilbert Islands. *The Journal of the Polynesian Society 74(4)*, 396-437.

Marshall, M. & Marshall, L. B. (1975). Opening Pandora's Bottle: Reconstructing Micronesians' Early Contacts with Alcoholic Beverages. *The Journal of the Polynesian Society 84(4)*, 441-465.

## Marshallese (SCCS108)

S1Erdland, A. (1961[1914]). *The Marshall Islanders: life and customs, thought and religion of a South Seas people [Die Marshall-Insulaner]*. Münster.

S1Krämer, A. & Nevermann, H. (1961[1938]). *Ralik-Ratak (Marshall Islands) [Ralik-Ratak (Marshall Inseln)]*. Hamburg: Friederichsen, De Gruyter and Co.

S1Mason, L. (1947). *The economic organization of the Marshall Islanders*. Honolulu: U.S. Commercial Company, Economic Survey.

S2Spoehr, A. (1949). *Majuro: a village in the Marshall Islands*. Chicago: Chicago Natural History Museum.

Carucci, L. M. (1987). JEKERO: symbolizing the transition to manhood in the Marshall Islands. *Micronesica 20(1-2)*, 1-17.

## Trukese (SCCS109)

S1Gladwin, T. & Sarason, S. B. (1953). *Truk: man in paradise*. New York: Wenner-Gren Foundation for Anthropological Research.

S2LeBar, F. M. (1963). *The material culture of Truk*. Unpublished Manuscript. HRAF.

Bollig, L. (1967[1927]). *The inhabitants of the Truk Islands [Die Bewohner der Truk-Inseln]*. Munster: Aschendorff.

Marshall, M. (1979). *Weekend warriors: alcohol in a Micronesian culture*. Palo Alto: Mayfield.

Marshall, M. & Marshall, L. B. (1990). *Silent voices speak: women and prohibition in Truk*. Belmont: Wadsworth.

## Yapese (SCCS110)

S1Furness, W. H. (1910). *The island of stone money: Uap of the Carolines*. Philadelphia: J.B. Lippincott.

S1Müller, W. (1917). *Yap*. Hamburg: L. Friederichsen & Co.

S1Salesius, F. (1963[1906]). *The Carolines Island Yap [Die Karolinen-Insel Jap]*. Berlin: Wilhelm Süsserot.

S1Senfft, A. (1962[1903]). *Ethnographic contributions concerning the Caroline Islands of Yap [Ethnographische Beiträge über die Karolineninsel Yap]*. Gotha: Justus Perthes.

Marshall, M. & Marshall, L. B. (1975). Opening Pandora's Bottle: Reconstructing Micronesians' Early Contacts with Alcoholic Beverages. *The Journal of the Polynesian Society 84(4)*, 441-465.

## Palauans (SCCS111)

E1Barnett, H. G. (1949). *Palauan society: a study of contemporary native life in the Palau Islands*. Eugene: University of Oregon Publications.

E1Barnett, H. G. (1963). *Being a Palauan*. New York: Holt, Rinehart and Winston.

Marshall, M. & Marshall, L. B. (1975). Opening Pandora's Bottle: Reconstructing Micronesians' Early Contacts with Alcoholic Beverages. *The Journal of the Polynesian Society 84(4)*, 441-465.

Nero, K. L. (1990). The hidden pain: drunkenness and domestic violence in Palau. *Pacific studies 13(3)*, 63-92.

## Ifugao (SCCS112)

S1Barton, R. F. (1922). Ifugao economics. *University of California Publications in American Archaeology and Ethnology 15(5)*, 385-466.

S1Barton, R. F. (1946). *The religion of the Ifugao*. Menasha: American Anthropological Association.

S1Barton, R. F. (1955). *The mythology of the Ifugaos*. Philadelphia: American Folklore Society.

Barton, R. F. (1911). The harvest feast of the Kiangan Ifugao. *Philippine journal of science* *6*, 81-105.

Lambrecht, F. (1932-1941). *The Mayawyaw ritual: parts 1-5*. Washington: Catholic Anthropological Conference.

Villaverde, J. (1909). The Ifugaos of Quiangan and vicinity. *Philippine journal of science 4*, 237-262.

Gibbs, H. D. & Agcaoili, F. (1912). The Alcohol Industry of the Philippine Islands. Part III. Fermented Beverages which are Not Distilled. *Philippine journal of science 7*, 97-119.

## Atayal (SCCS113)

S3Beauclair, I. (1956). Present day conditions among the Aborigines of Formosa (Atayal and Bunun). *Sociologus 6(2),* 153-169.

S3LeBar, F. M. (1975). Atayal. In F. M. LeBar (Ed.), *Ethnic groups of Insular Southeast Asia, Volume 2: Philippines and Formosa* (pp. 142-148). New Haven: HRAF Press.

S3Rui, Y. et al. (1955) Ethnographical investigation of some aspects of the Atayal, Chin-shui Ts'un, Miaoli Hsien. *Bulletin of the Department of Archaeology and Anthropology, National Taiwan University 5*, 113-127.

## Chekiang (SCCS114)

S1Fei, H. (1946). *Peasant life in China: a field study of country life in the Yangtze Valley*. New York: Oxford University Press.

S2Fei, H. (1979). A revisit to Kaihsienkung. In J. P. McGough (Ed.), *Fei Hsiao-tʾung: the dilemma of a Chinese intellectual* (pp. 39-74). White Plains: M. E. Sharpe.

Dikötter, F., Laamann, L. & Xun, Z. (2004). *Narcotic Culture: A History of Drugs in China*. Hong Kong: Hong Kong University Press.

## Manchu (SCCS115)

S1Shirokogorov, S. M. (1924). *Social organization of the Manchus: A study of the Manchu clan organization*. Shanghai: Royal Asiatic Society.

Hoshino T. (1921). *Economic history of Manchuria: compiled in commemoration of the decennial of the Bank of Chosen*. Seoul: Bank of Chosen.

Isett, C. M. (2007). *State, peasant, and merchant in Qing Manchuria*, 1644-1862. Stanford: Stanford University Press.

Smith, N. (2012). *Intoxicating Manchuria: Alcohol, Opium, and Culture in China’s Northeast*. Vancouver: UBC Press.

## Koreans (SCCS116)

S1Osgood, C. (1951). *The Koreans and their culture*. New York: Ronald Press.

## Japanese (SCCS117)

S1Beardsley, R. K., Hall, J. W. & Ward, R. E. (1972). *Village Japan*. Chicago: University of Chicago Press.

S1De Vos, G. A. (1973). Social values and personal attitudes in primary human relations in rural Japan. In G. A. De Vos(Eds.), *Socialization for achievement: essays on the cultural psychology of the Japanese* (pp. 61-109). Berkeley: University of California Press.

Cornell, J. B. (1956). Matsunagi: the life and social organization of a Japanese mountain community. In J. B. Connel & R. J. Smith (Eds.), *Two Japanese Villages* (pp. 113-232). Ann Arbor: University of Michigan Press.

## Ainu (SCCS118)

S1Batchelor, J. (1927). *Ainu life and lore*. Tokyo: Kyobunkwan.

S1Hitchcock, R. (1891). The Ainos of Yezo Japan. *Report of the United States National Museum for the year ending June 30, 1890*, 429–502.

Batchelor, J. (1901). *The Ainu And Their Folklore*. London: The Religious Tract Society.

Munro, N. G. (1963). *Ainu creed and cult*. New York: Columbia University Press.

Murdock, G. P. (1934). The Ainus of Northern Japan. In G. P. Murdock (Ed.), *Our Primitive Contemporaries* (pp. 163-191). New York: Macmillan.

## Nivkh (SCCS119)

S1Shternberg, L. (1964[1933]). *The Gilyak, Orochi, Goldi, Negidal, Ainu: articles and materials [Giliaki, orochi, gol'dy, negidal'tsy, ainy; stati i materialy]*. Khabarovsk: Dal'giz.

Black, L. (1973). The Nivkh (Gilyak) of Sakhalin and the Lower Amur. *Arctic anthropology 10(1)*, 1-110.

Seeland, N. (1953[1882]). The Gilyaks: an ethnographic sketch [Die Ghiliaken. Eine ethnographische Skizze]. *Russische revue 21*, 97-130,224-254.

Shrenk, L. I. (1964[1881-1895]). *The peoples of the Amur region [Die Völker des Amur-Landes]*. St. Petersburg: Kaiserliche Akademie der Wissenschaften.

## Yukaghir (SCCS120)

S2Graburn, N. H. H. & Strong, B. S. (1973). The decline of the Yukagirs. In *Circumpolar peoples: an anthropological perspective* (pp. 38-49). Pacific Palisades: Goodyear.

S2Jochelson, W. (1975). *The Yukaghir and the Yukaghirized Tungus*. New York: AMS Press.

## Chukchi (SCCS121)

S1Bogoraz, W. (1904). *The Chukchee*. Leiden: Brill.

## Deg Xit'an (SCCS122)

S1Osgood, C. (1958). *Ingalik social culture*. New Haven: Yale University Press.

S1Osgood, C. (1970). *Ingalik material culture*. New Haven: Human Relations Area Files Press.

VanStone, J. W. (1979). *Ingalik contact ecology: an ethnohistory of the lower-middle Yukon, 1790-1935*. Chicago: Field Museum of Natural History.

## Aleut (SCCS123)

S1Veniamov, I. E. P. (1840). *Notes on the Islands of the Unalaska District [Zapiski ob ostravakh Unalashkinskago otdiela]*. St. Petersburg: Russian-American Company.

Berreman, G. D. (1956). Drinking Patterns of the Aleuts. *Quarterly Journal of Studies on Alcohol 17(3)*, 503–514.

Coxe, W. (1804) *Account of the Russian discoveries between Asia and America*. London: Cadell and Davies.

## Copper Inuit (SCCS124)

S1Jenness, D. (1922). *The life of the Copper Eskimos*. Ottawa: F.A. Acland.

## Montagnais (SCCS125)

SCCSSpeck, F. G. (1935). *Naskapi, the savage hunters of the Labrador peninsula*. Norman: University of Oklahoma Press.

S1Lips, J. (1947). Naskapi law: law and order in a hunting society. *Transactions of the American Philosophical Society 37(4)*, 379-492.

E1Turner, L. M. (1894). Ethnology of the Ungava district, Hudson Bay Territory. *Eleventh annual report of the Bureau of Ethnology to the Secretary of the Smithsonian Institution 1889-90*, 159-350.

Lane, K. S. (1952). *The Montagnais Indians, 1600-1640*. Berkeley: The Kroeber Anthropological Society.

Tanner, V. (1944). Outlines of the geography, life and customs of Newfoundland-Labrador. *Acta geographica 8*, 575-700.

## Mi'kmaq (SCCS126)

S1Denys, N. (1908). *Description and natural history of the coasts of North America (Acadia)*. Toronto: The Champlain Society.

S1Le Clercq, C. (1910). *New relation of Gaspesia: with the customs and religion of the Gaspesian Indians*. Toronto: The Champlain Society.

Bock, P. K. (1966). *The Micmac Indians of Restigouche: history and contemporary description*. Ottawa: Dept. of the Secretary of State.

Wallis, W. D. & Wallis, R. S. (1953). Culture loss and culture change among the Micmac of the Canadian Maritime Provinces 1912-1950. *Kroeber Anthropological Society papers 8/9*, 100-129.

Wallis, W. D. & Wallis, R. S. (1955). *The Micmac Indians of eastern Canada*. Minneapolis: University of Minnesota Press.

## Northern Saulteaux (SCCS127)

S1Hallowell, A. I. (1955). *Culture and experience*. Philadelphia: University of Pennsylvania.

E1Hilger, M. I. (1939). *A social study of one hundred fifty Chippewa Indian families of the White Earth Reservation of Minnesota*. Washington: The Catholic University of America Press.

E1Kinietz, W. V. (1947). *Chippewa village: the story of Katikitegon*. Bloomfield Hills: Cranbrook Press.

Bishop, Charles A. (1974). *The Northern Ojibwa and the fur trade: an historical and ecological study*. Toronto: Holt, Rinehart and Winston of Canada.

## DeneTha (SCCS128)

S1Helm, J. (1961). *The Lynx Point People: The Dynamics of a Northern Athapaskan Band*. Ottawa: Dept. of Northern Affairs and National Resources.

SCCSHonigmann, J. J. (1946). *Ethnography and Acculturation of the Fort Nelson Slave*. New Haven: Yale University Press.

## Kaska (SCCS129)

SCCSHonigmann, J. J. (1949). *Culture and ethos of Kaska society*. New Haven: Yale University Press.

## Eyak (SCCS130)

S1Birket-Smith, K. & De Laguna, F. (1938). *The Eyak Indians of the Copper River Delta, Alaska*. København: Levin & Munksgaard.

S2De Laguna, F. (1990). Eyak. In W. Suttles (Ed.), *Handbook of North American Indians. Northwest Coast. Vol. 7* (pp. 189-196). Washington, D.C.: Smithsonian Institution.

## Haida (SCCS131)

S1Murdock, G. P. (1934). The Haidas of British Columbia. In *Our primitive contemporaries* (pp. 221-263). New York: Macmilliam.

S1Swanton, J. R. (1905). *Contributions to the ethnology of the Haida*. Leiden: Brill.

S2van den Brink, J. H. (1974). *The Haida Indians: cultural change mainly between 1876-1970*. Leiden: Brill.

## Nuxalk (SCCS132)

S1McIlwraith, T. F. (1948a). *The Bella Coola Indians: volume one*. Toronto: University of Toronto Press.

S1McIlwraith, T. F. (1948b). *The Bella Coola Indians: volume two*. Toronto: University of Toronto Press.

## Twana (SCCS133)

S1Elmendorf, W. W. (1960). *The structure of Twana culture*. Pullman: Washington State University.

S3Eells, M. (1877). *The Twana Indians of the Skokomish Reservation in Washington Territory*. Washington: Department of the Interior.

E1Smith, M. W. (1940). *The Puyallup-Nisqually*. New York: Columbia University Press.

Smith, M. W. (1963). The Puyallup of Washington. In R. Linton (Ed.), *Acculturation in seven American Indian tribes* (pp. 3-38). Gloucester: Peter Smith.

## Yurok (SCCS134)

S1Heizer, R. F. & Mills, J. E. (1952). *The four ages of Tsurai: a documentary history of the Indian village on Trinidad Bay*. Berkeley: University of California Press.

S1Kroeber, A. L. (1925). *Handbook of the Indians of California*. Washington: Government Printing Office.

## Eastern Pomo (SCCS135)

SCCSBarrett, S. A. (1908). *The ethno-geography of the Pomo and neighboring Indians*. Berkeley: University of California Press.

SCCSBarrett, S. A. (1952). *Material aspects of Pomo culture*. Milwaukee: Public Museum of the City of Milwaukee.

S1Kroeber, A. L. (1953). Pomo Indians. In *Handbook of the Indians of California* (pp. 222-271). Berkeley: California Book Company.

S1Loeb, E. M. (1926). *Pomo folkways*. Berkeley: University of California Press.

## Southern Valley Yokuts (SCCS136)

S2Gayton, A. H. (1948). *Yokuts and western Mono ethnography: vol. 1, Tulare Lake, Southern Valley, and Central Foothill Yokuts*. Berkeley: University of California Press.

E1Latta, F. F. (1949). *Handbook of Yokuts Indians*. Oildale: Bear State Books.

## Wadadokado (SCCS137)

S1Whiting, B. B. (1950). *Paiute sorcery*. New York: Viking Fund.

E1Kelly, I. T. (1934). *Ethnography of the Surprise Valley Paiute*. Berkeley: University of California Press.

## Klamath (SCCS138)

S2Spier, L. (1930). *Klamath ethnography*. Berkeley: University of California Press.

S2Gatschet, A. S. (1890). *The Klamath Indians of southwestern Oregon*. Washington: Government Printing Office.

## Kutenai (SCCS139)

S1Turney-High, H. H. (1941). *Ethnography of the Kutenai*. Menasha: American Anthropological Association.

S2Chamberlain, A. F. (1892). Report on the Kootenay Indians of south-eastern British Columbia. In *Report of the sixty-second meeting of the British association for the advancement of science held at Edinburgh in August 1892* (pp. 545-615). London: John Murray.

Schaeffer, C. E. (1965). The Kutenai female berdache: Courier, guide, prophetess, and warrior. *Ethnohistory 12(3)*, 193-236.

## Gros Ventre (SCCS140)

S1Flannery, R. (1953). *The Gros Ventres of Montana: part 1, Social life*. Washington: Catholic University of America Press.

## Hidatsa (SCCS141)

S1Wilson, G. L. (1987). *Buffalo Bird Woman's garden: agriculture of the Hidatsa Indians*. St. Paul: Minnesota Historical Society Press.

S3Bowers, A. W. (1965). *Hidatsa social and ceremonial organization*. Washington: Government Printing Office.

SCCSMatthews, W. (1877). *Ethnography and Philology of the Hidatsa Indians*. Washington: Government Printing Office.

## Pawnee (SCCS142)

S1Weltfish, G. (1965). *The lost universe: with a closing chapter on 'The universe regained'*. New York: Basic Books.

Blaine, M. R. (1990). *Pawnee passage, 1870-1875*. Norman: University of Oklahoma Press.

Reid, G. F. & Beierle, J. (1998). *Culture summary: Pawnee*. New Haven: HRAF.

Smith, D. Z. (1852). Description of the manners and customs of the Pawnee Indians. *Moravian Church miscellany 3*, 86-94.

## Omaha (SCCS143)

S1Dorsey, J. O. (1884). Omaha sociology. In *Bureau of Ethnology, third annual report, 1881-82* (pp. 205-370). Washington: Government Printing Office.

S1Fletcher, A. C. & La Flesche, F. (1911). The Omaha tribe. In *Twenty-seventh annual report of the Bureau of American Ethnology, 1905-06* (pp. 17-672). Washington: Government Printing Office.

S1Fortune, R. (1932). *Omaha secret societies*. New York: Columbia University Press.

## Huron (SCCS144)

S2Kinietz, W. V (1940). Huron. In *The Indians of the western Great Lakes 1615-1760* (pp. 1-160). Ann Arbor: University of Michigan Press.

S2Trigger, B. G. (1969). *The Huron farmers of the north*. New York: Holt, Rinehart and Winston.

S3Trigger, B. G. (1976). *The children of Aataentsic: a history of the Huron people to 1660*. Montreal: McGill-Queen's University Press.

## Muscogee (SCCS145)

S1Swanton, J. R. (1928a). *Religious beliefs and medicinal practices of the Creek Indians*. Washington: Government Printing Office.

S1Swanton, J. R. (1928b). *Social Organization and Social Usages of the Indians of the Creek Confederacy*. Washington: Government Printing Office.

Abbott, P. J. (1996). American Indian and Alaska native aboriginal use of alcohol in the United States. *American Indian and Alaska Native Mental Health Research 7(2)*, 1-13.

Bacon, M. K., Barry III, H., Child, I. L., & Snyder, C. R. (1965). A cross-cultural study of drinking: V. Detailed definitions and data. *Quarterly Journal of Studies on* Alcohol, Supplement, 26(S3), 78-111.

## Natchez (SCCS146)

S1Swanton, J. R. (1911). The Natchez group. In *Indian tribes of the lower Mississippi and adjacent coast of the Gulf of Mexico* (pp. 45-274). Washington: Government Printing Office.

S2Barnett, J. F. (2007). *The Natchez Indians: a history to 1735*. Jackson: University Press of Mississippi.

## Comanche (SCCS147)

S1Hoebel, E. A. (1940). *The political organization and law-ways of the Comanche Indians*. Menasha: American Anthropological Association.

S1Wallace, E. & Hoebel, E. A. (1952). *The Comanches: lords of the south Plains*. Norman: University of Oklahoma Press.

## Chiricahua (SCCS148)

S1Opler, M. E. (1941). *An Apache life-way: the economic, social, and religious institutions of the Chiricahua Indians*. Chicago: University of Chicago Press.

S2Castetter, E. F. & Opler, M. E. (1936). *The ethnobiology of the Chiricahua and Mescalero Apache: A. the use of plants for food, beverages and narcotics*. Albuquerque: University of New Mexico Press.

## Zuni (SCCS149)

S1Cushing, F. H. (1920). *Zuñi breadstuff*. New York: Museum of the American Indian, Heye Foundation.

S1Stevenson, M. C. E. (1904). *The Zuni Indians: their mythology, esoteric fraternities, and ceremonies*. Washington: Government Printing Office.

Waddell, J. O. & Everett, M. W. (1980). *Drinking behavior among Southwestern Indians*. Tucson: University of Arizona Press.

Abbott, P. J. (1996). American Indian and Alaska native aboriginal use of alcohol in the United States. *American Indian and Alaska Native Mental Health Research 7(2)*, 1-13.

## Havasupai (SCCS150)

S1Spier, L. (1928). Havasupai ethnography. *Anthropological Papers of the American Museum of Natural History 29*, 81-408.

S2Smithson, C. L. (1959). *The Havasupai woman*. Salt Lake City: University of Utah Press.

Abbott, P. J. (1996). American Indian and Alaska native aboriginal use of alcohol in the United States. *American Indian and Alaska Native Mental Health Research 7(2)*, 1-13.

## Tohono O'odham (SCCS151)

SCCSLumholtz, C. (1912). *New Trails in Mexico: An Account of One Year's Exploration in North-western Sonora, Mexico, and South-western Arizona 1909-1910*. New York: Scribner.

S2Underhill, R. M. (1936). *The autobiography of a Papago woman*. Menasha: American Anthropological Association.

S2Underhill, R. M. (1939). *Social organization of the Papago Indians*. New York: Columbia University Press.

S2Underhill, R. M. (1946). *Papago Indian religion*. New York: Columbia University Press.

E1Castetter, E. F. & Underhill, R. M. (1935). *The ethnobiology of the Papago Indians*. Albuquerque: University of New Mexico Press.

## Huichol (SCCS152)

S1Lumholtz, C. (1898). The Huichol Indians of Mexico. *Bulletin of the American Museum of Natural History 10*, 1-14.

S1Lumholtz, C. (1973). *Unknown Mexico. Vol. II*. New York: AMS Press.

S1Zingg, R. M. (1938). *Report of the Mr. and Mrs. Henry Pfeiffer expedition for Huichol ethnography*. New York: G.E. Stechert and Company.

## Aztec (SCCS153)

S1Durán, D. (1971). *Book of the gods and rites and the ancient calendar*. Norman: University of Oklahoma Press

S1Motolinía, T. (1951). *Motolinia's history of the Indians of New Spain*. Washington, DC: Academy of American Franciscan History.

S1Soustelle, J. (1961). *The daily life of the Aztecs on the eve of the Spanish conquest*. London: Weidenfeld and Nicolson.

SCCSVaillant, G. C. (1944). *Aztecs of Mexico*. Harmondsworth: Penguin Books.

## Sierra Popoluca (SCCS154)

S1Foster, G. M. (1942). *A primitive Mexican economy*. New York: J.J. Augustin.

S1Foster, G. M. (1945). *Sierra Popoluca folklore and beliefs*. Berkeley: University of California Press.

Ojeda-Linares, C. et al. (2021). Traditional fermented beverages of Mexico: a biocultural unseen foodscape. *Foods 10(10)*, 2390.

## K'iche' (SCCS155)

S1Bunzel, R. L. (1952). *Chichicastenango: a Guatemalan village*. Locust Valley, N.Y.: J. J. Augustin.

S2Rodas, N. F., Rodas, O. C. & Hawkins, L. F. (1940). *Chichicastenango: the Kiche Indians; their history and culture; sacred symbols of their dress and textiles*. Guatemala: Unión Tipográfica.

## Miskito (SCCS156)

S1Conzemius, E. (1932). *Ethnographical survey of the Miskito and Sumu Indians of Honduras and Nicaragua*. Washington: Government Printing Office.

Coe, F. G. & Anderson, G. J. (1997). Ethnobotany of the Miskitu of eastern Nicaragua. *Journal of ethnobiology 17(2)*, 171-214.

## Bribri (SCCS157)

S1Skinner, A. (1920). *Notes on the Bribri of Costa Rica*. New York: Museum of the American Indian, Heye Foundation.

S1Gabb, W. M. (1876). On the Indian tribes and languages of Costa Rica. *Proceedings of the American Philosophical Society 14*, 483-602.

E2Stone, D. (1962). *The Talamancan tribes of Costa Rica*. Cambridge: Peabody Museum.

## Guna (SCCS158)

S1Densmore, F (1926). *Music of the Tule Indians of Panama*. Washington: Smithsonian Institution.

S1Nordenskiöld, E. (1938). *An historical and ethnological survey of the Cuna Indians*. Göteborg: Göteborg Museum.

S1Stout, D. B. (1947). *San Blas Cuna acculturation: an introduction*. New York: Viking Fund.

SCCSWafer, L. (1934). *A New Voyage and Description of the Isthmus of America*. Oxford: Hakluyt Society.

## Wayuu (SCCS159)

S1Gutiérrez de Pineda, V. (1960[1950]). *Social organization in La Guajira [Organizacion Social en la Guajira]*. HRAF.

S1Pineda Giraldo, R. (1961[1950]). *Aspects of magic in La Guajira [Aspectos de la Magía en la Guajira]*. HRAF.

S2Bolinder, G. (1957). *Indians on horseback*. London: Dennis Dobson.

Armstrong, J. M. & Métraux, A. (1948). The Goajiro. In J. H. Steward (Ed.), *Handbook of South American Indians. Volume 4. The circum-Caribbean tribes* (pp. 369-383). Washington: Government Printing Office.

## Haitians (SCCS160)

S1Herskovits, M. J. (1937) *Life in a Haitian valley*. New York: Alfred A. Knopf.

Métraux, A. (1951). *Making a living in the Marbial Valley, Haiti*. Paris: UNESCO.

## Callinago (SCCS161)

S1Breton, R. & de la Paix, A. (1958[1929]). *An account of the Island of Guadaloupe [Relations de l'Ile de la Guadeloupe]*. Paris.

S1Breton, R. (1958[1665]). *Carib-French dictionary [Dictionaire caraibe-françois]*. Gilles Bouquet.

S1Rouse, I. (1948). The Carib. In J. H. Steward (Ed.), *Handbook of South American Indians. Volume 4. The circum-Caribbean tribes* (pp. 547-565). Washington: Government Printing Office.

Hodge, W. H. & Taylor, D. (1957). The ethnobotany of the Island Caribs of Dominica. *Webbia 12*(2),513-644.

## Warao (SCCS162)

S1Turrado Moreno, A. (1966[1945]). *Ethnography of the Guarauno Indians [Etnografía de los indios guaraunos]*. Caracas: Lit. y Tip. Vargas.

SCCSWilbert, J. (1972). The Fishermen: the Warao of the Orinoco Delta. In *Survivors of Eldorado; four Indian cultures of South America* (pp. 65-115). New York: Praeger.

Kirchhoff, P. (1948). The Warrau. In J. W. Steward (Ed.), *Handbook of South American Indians. Vol. 3. The tropical forest tribes* (pp. 869-881). Washington: Government Printing Office.

## Yanomami (SCCS163)

S1Chagnon, N. A. (1968). *Yanomamö: the fierce people*. New York: Holt, Rinehart and Winston.

E1Barker, J. (1967[1953]). Memoir on the culture of the Waica [Memoria sobre la cultura de los Guaika]. *Boletín Indigenista Venezolano 1*, 433-489.

E1Wilbert, J. (1963). Los Sanema. In *Indios de la región Orinoco-Ventuari* (pp. 11-20, 177-236). Caracas: Fundación La Salle de Ciencias Naturales.

## Barama River Carib (SCCS164)

S1Gillin, J. (1936). *The Barama River Caribs of British Guiana*. Cambridge: Peabody Museum.

## Saramaccan (SCCS165)

S1Herskovits, M. J. & Herskovits F. S. (1934). *Rebel destiny: among the bush Negroes of Dutch Guiana*. New York: Whittlesey House.

S1Price, R. & Price, S. (1991). *Two evenings in Saramaka*. Chicago: University of Chicago Press.

SCCSKahn, M. C. (1929). Notes on the Saramaccaner Bush Negroes of Dutch Guiana. *American Anthropologist 31(3)*, 468-490.

## Munduruku (SCCS166)

S1Murphy, R. F. (1960). *Headhunter's heritage; social and economic change among the Mundurucú Indians*. Berkeley: University of California Press.

S1Tocantins, A. M. G. (1959[1877]). *Studies on the Mundurucu Tribe [Estudos sobre a Tribu 'Mundurucu']*. Rio de Janeiro: J.M.N. Garcia.

Horton, D. (1948). The Mundurucu. In J. W. Steward (Ed.), *Handbook of South American Indians. Vol. 3. The tropical forest tribes* (pp. 271-282). Washington: Government Printing Office.

## Cubeo (SCCS167)

S1Goldman, I. (1963). *The Cubeo: Indians of the Northwest Amazon*. Urbana: University of Illinois Press.

da Silva, A. B. A. (1970[1962]). *The indigenous civilization of the Uaupés [A civilizaçao indigena do Uaupés]*. Sao Paulo: Centro de Pesquisas de Iauareté.

## Chachi (SCCS168)

S1Barrett, S. A. (1925). *The Cayapa Indians of Ecuador*. New York: Museum of the American Indian, Heye Foundation.

SCCSAltschuler, M. (1965). *The Cayapa: a study in legal behavior*. PhD Thesis. University of Minnesota.

## Shuar (SCCS169)

S1Karsten, R. (1935). *The head-hunters of Western Amazonas: the life and culture of the Jibaro Indians of eastern Ecuador and Peru*. Helsingfors: Societas Scientiarum Fennica.

S1Rivet, P. (1908). *The Jivaro Indians: geographic, historical and ethnographic research*. Paris: Masson et Cie.

Harner, M. J. (1973). *The Jívaro: people of the sacred waterfalls*. Garden City: Anchor Press.

## Amahuaca (SCCS170)

S1Carneiro, R. L. (1964). The Amahuaca and the spirit world. *Ethnology 3(1),* 6-11.

S2Carneiro, R. L. (1962). The Amahuaca Indians of eastern Peru. *Explorers journal 40(4)*, 26-37.

S2Woodside, J. H. (1981). *Developmental sequences in Amahuaca society*. Ph.D. Thesis. University of Minnesota.

Dole, G. E. (1994). Amahuaca. In J. Wilbert (Ed.), *Encyclopedia of World Cultures, Vol. 7, South America* (pp. pp. 33-36). Boston, Mass.: G. K. Hall & Co.

Hewlett, C. E. (2014). *History, kinship and comunidad: learning to live together amongst Amahuaca people on the Inuya River in the Peruvian Amazon*. PhD thesis. University of St. Andrews.

Lamb, F. B. (1981). Wizard of the Upper Amazon as Ethnography. *Current Anthropology 22(5)*, 577-580.

## Inca (SCCS171)

S1Cieza de León, P. de (1864). *The travels of Pedro de Cieza de Lóon, A.D. 1532-50 [Parte primera de la chronica del Peru, 1553]*. London: Hakluyt Society.

S1Cobo, B (1961[1893]). *History of the New World [Historia del Nuevo mundo]*. Sevilla: Sociedad de Bibliofilos Andaluces.

S1Rowe, J. H. (1946). Inca culture at the time of the Spanish conquest. In J. W. Steward (Ed.), *Handbook of South American Indians. Vol. 2. The Andean civilizations* (pp. 183-330). Washington: Government Printing Office.

## Aymara (SCCS172)

SCCSTschopik, H. Jr. (1946). The Aymara. In J. W. Steward (Ed.), *Handbook of South American Indians. Vol. 2. The Andean civilizations* (pp. 501-573). Washington: Government Printing Office.

S1Tschopik, H. Jr. (1951). The Aymara of Chucuito, Peru: 1. Magic. *Anthropological Papers of the American Museum of Natural History 44(2)*, 133-308.

S1La Barre, W. (1948). *The Aymara Indians of the Lake Titicaca Plateau*. Menasha: American Anthropological Association.

## Sirionó (SCCS173)

S1Holmberg, A. R. (1950). *Nomads of the long bow: the Siriono of eastern Bolivia*. Washington: Government Printing Office.

## Nambikwara (SCCS174)

S1Lévi-Strauss, C. (1948). The Nambicuara. In J. W. Steward (Ed.), *Handbook of South American Indians. Vol. 3. The tropical forest tribes* (pp. 361-369). Washington: Government Printing Office.

Roquette-Pinto, E. (1959[1938]). *Rondonia*. Sao Paulo: Companhia Editora Nacional.

## Trumai (SCCS175)

S1Murphy, R. F. & Quain, B. H. (1955). *The Trumaí Indians of central Brazil*. Locust Valley, N.Y.: J. J. Augustin.

## Canela (SCCS176)

S1Nimuendaju, C. (1946). *The Eastern Timbira*. Berkeley: Universtiy of California Press.

SCCSCrocker, W. H. (1990). *The Canela (Eastern Timbira), I: an ethnographic introduction*. Washington: Smithsonian Institution Press.

## Tupinambá (SCCS177)

S1Lery, J. de (1956[1880]). *History of a voyage to Brazil [Histoire d'un voyage faict en la terre du Brésil]*. Paris: Alphonse-Lemerre

S1Soares de Souza, G. (1956[1851]). *Descriptive treatise on Brazil in 1587 [Tratado descriptivo do Brazil em 1587]*. Rio de Janeiro: Typographia Universal de Laemmert.

S1Staden, H. (1928). *Hans Staden: the true story of his captivity*. New York: George Routledge and Sons.

S1Thevet, A. (1878). *Les singularitez de la France antarctique (Nouvelle édition).* Paris: Maisonneuve & Cie.

Métraux, A. (1948). The Tupinamba. In J. W. Steward (Ed.), *Handbook of South American Indians. Vol. 3. The tropical forest tribes* (pp. 95-118). Washington: Government Printing Office.

## Aimoré (SCCS178)

SCCSEhrenreich, P. (1887). *Ueber die Botocudos der brasilianischen Provinzen Espiritu santo und Minas Geraes*. Berlin: Dietrich Reimer Verlag.

S1Nimuendajú, C. (1946). Social organization and beliefs of the Botocudo of eastern Brazil. *Southwestern journal of anthropology 2(1)*, 93-115.

S3Keane, A. H. (1884). On the Botocudos. *Journal of the Anthropological Institute of Great Britain and Ireland 13*, 199-213.

## Shavante (SCCS179)

S1Maybury-Lewis, D. (1967). *Akwẽ-Shavante society*. Oxford: Clarendon Press.

SCCSMaybury-Lewis, D. (1965). Some crucial distinctions in Central Brazilian ethnology. Anthropos 60, 340-358.

Coimbra, C. E., Chor, D., Santos, R. V., & Salzano, F. M. (2001). Blood pressure levels in Xavante adults from the Pimentel Barbosa Indian Reservation, Mato Grosso, Brazil. *Ethnicity & disease 11(2)*, 232-240.

## Aweikoma (SCCS180)

S1Henry, J. (1941). *Jungle people: a Kaingang tribe of the highlands of Brazil*. Locust Valley, New York: J. J. Augustin.

## Cayua (SCCS181)

S1Métraux, A. (1948). The Guarani. In J. W. Steward (Ed.), *Handbook of South American Indians. Vol. 3. The tropical forest tribes* (pp. 69-94). Washington: Government Printing Office.

E1Watson, J. B. (1945). Historic influences and change in the economy of a southern Mato Grosso tribe. *Acta Americana 1(3)*, 3-25.

E1Watson, J. B. (1952). *Cayuá culture change: a study in acculturation and methodology*. Menasha: American Anthropological Association.

## Lengua (SCCS182)

S1Grubb, W. B. (1911). *An unknown people in an unknown land*. London: Seeley and Co.

## Abipón (SCCS183)

S1Dobrizhoffer, M. (1822). *An account of the Abipones, an equestrian people of Paraguay: volume 2*. London: John Murray.

## Mapuche (SCCS184)

S1Faron, L. C. (1961). *Mapuche social structure: institutional reintegration in a patrilineal society of central Chile*. Urbana: The University of Illinois Press.

S1Hilger, M. I. (1957). *Araucanian child life and its cultural background*. Washington: Smithsonian Institution.

S1Titiev, M. (1951). *Araucanian culture in transition*. Ann Arbor: University of Michigan Press.

E1Cooper, J. M. (1946). The Araucanians. In J. W. Steward (Ed.), *Handbook of South American Indians. Vol. 2. The Andean civilizations* (pp. 687-760). Washington: Government Printing Office.

## Tehuelche (SCCS185)

S1Musters, G. C. (1872). On the races of Patagonia. *Journal of the Anthropological Institute of Great Britain and Ireland 1*, 193-207.

S1Musters, G. C. (1873). *At home with the Patagonians*. London: J. Murray.

Cooper, J. M. (1946). The Patagonian and Pampean hunters. In J. W. Steward (Ed.), *Handbook of South American Indians. Vol. 1. The marginal tribes* (pp. 127-168). Washington: Government Printing Office.

## Yahgan (SCCS186)

S2Gusinde, M. (1961[1937]). *The Yahgan: the life and thought of the water nomads of Cape Horn [Die Yamana: vom Leben und Denken der Wassernormaden am Kap Hoorn]*. Modling bei Wien: Anthropos.

Cooper, J. M. (1946). The Yahgan. In J. W. Steward (Ed.), *Handbook of South American Indians. Vol. 1. The marginal tribes* (pp. 81-106). Washington: Government Printing Office.
